# Supplementary material for: Combinatorial regulation of hepatic cytoplasmic signaling and nuclear transcriptional events by the OGT/REV-ERBα complex
Source: PubMed Central journal article supplement — Proc Natl Acad Sci U S A. 2018 Nov 5;115(47):E11033–42. doi: 10.1073/pnas.1805397115 (PMC6255172; doi:10.1073/pnas.1805397115), 2018-11-05
Supplement: pnas.1805397115.sapp.pdf [file pnas.1805397115.sapp.pdf]

## SUPPLEMENTAL INFORMATION TO

### **Combinatorial regulation of cytoplasmic signaling and nuclear transcriptional events by the OGT/REV-ERB $\alpha$ complex.**

Alexandre Berthier<sup>a</sup>, Manjula Vinod<sup>a</sup>, Geoffrey Porez<sup>a</sup>, Agata Steenackers<sup>b</sup>, Jérémy Alexandre<sup>a</sup>, Nao Yamakawa<sup>b</sup>, Céline Gheeraert<sup>a</sup>, Maheul Ploton<sup>a</sup>, Xavier Maréchal<sup>a</sup>, Julie Dubois-Chevalier<sup>a</sup>, Agnès Hovasse<sup>c</sup>, Christine Schaeffer-Reiss<sup>c</sup>, Sarah Cianféranic<sup>c</sup>, Christian Rolando<sup>d,e,f</sup>, Fabrice Bray<sup>d,e,f</sup>, Hélène Duez<sup>a</sup>, Jérôme Eeckhoutte<sup>a</sup>, Tony Lefebvre<sup>b</sup>, Bart Staels<sup>a</sup> and Philippe Lefebvre<sup>a,1</sup>

<sup>a</sup> Univ. Lille, Inserm, Centre Hospitalier Universitaire de Lille, Institut Pasteur de Lille, U1011-European Genomic Institute for Diabetes, Lille, F-59045, France ; <sup>b</sup> Univ. Lille, CNRS, UMR 8576 - Unité de Glycobiologie Structurale et Fonctionnelle, Villeneuve d'Ascq, F-59655, France ; <sup>c</sup> Laboratoire de Spectrométrie de Masse BioOrganique, Univ. Strasbourg, CNRS, Institut Pluridisciplinaire Hubert Curien, UMR 7178, Strasbourg, F-67037, France; <sup>d</sup> Miniaturisation pour la Synthèse, l'Analyse & la Protéomique, CNRS, Unité de Service et de Recherche (USR) 3290, Univ. Lille, Villeneuve d'Ascq, F-59655, France ; <sup>e</sup> Fédération de Recherche Biochimie Structurale et Fonctionnelle des Assemblages Biomoléculaires FRABio, FR 3688 CNRS, Univ. Lille and <sup>f</sup> Institut M.-E. Chevreul, CNRS FR 2638, Univ. Lille, Villeneuve d'Ascq, F-59655, France.

§ Corresponding author philippe-claude.lefebvre@inserm.fr

**SUPPLEMENTAL FIGURES**

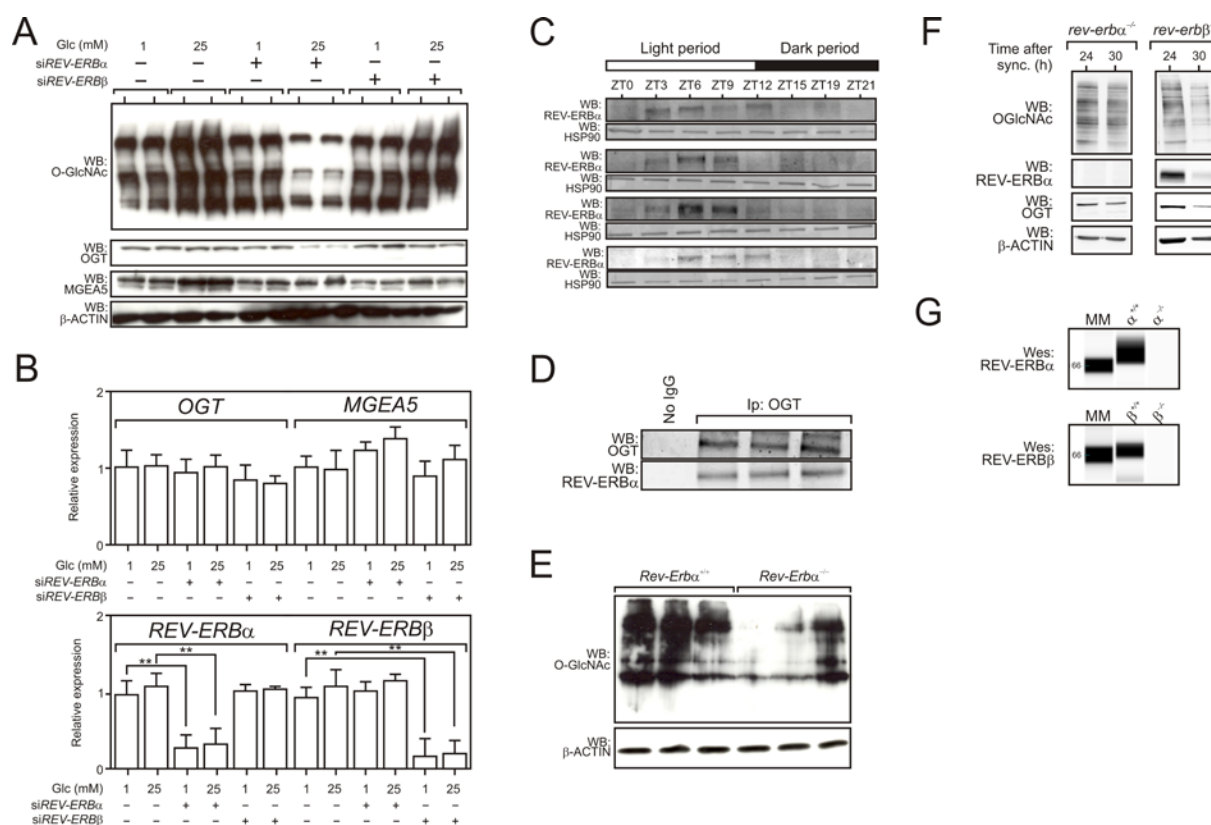

**Fig. S1, related to Figure 1: OGT protein level and activity are stabilized by REV-ERB $\alpha$  but not by REV-ERB $\beta$ .** A: Protein O-GlcNAcylation, OGT and OGA (MGEA5) protein levels were determined by western blotting (WB) of HepG2 whole cell extracts. HepG2 cells were transfected with siRNAs (targeting *REV-ERB $\alpha$*  and *REV-ERB $\beta$* ) and incubated for 24h at low (1 mM) or high (25 mM) glucose (Glc) concentration. B: Gene expression was determined by RT-qPCR analysis of total RNA extracted from siRNA-transfected HepG2 cells. Data are expressed relative to RNA amounts in siRNA control-transfected HepG2 cells incubated at 1 mM Glc. C: The hepatic REV-ERB $\alpha$  protein level in *ad libitum* fed mice was determined by western blot (WB) as a function of time. D: REV-ERB $\alpha$  interacts with OGT in mouse liver. Mouse liver extracts were immunoprecipitated with anti-OGT antibody and immunoprecipitates were analyzed by WB using anti-OGT and anti-REV-ERB $\alpha$  antibodies. E: O-GlcNAcylation level determined by WB for WT or *Rev-erb $\alpha$*  KO mouse liver at ZT6 (1). F: O-GlcNAcylation, REV-ERB $\alpha$  and OGT protein levels in *REV-ERB $\alpha$*  or *REV-ERB $\beta$* -deficient U2OS cells 24 and 30 hours after synchronisation. G: CRISPR-generated *REV-ERB $\alpha$*  and *REV-ERB $\beta$* -deficient U2OS clone validation by Simple Western (Wes). Statistical analysis: B: Histograms correspond to mean  $\pm$  SEM. The statistical significance was assessed by 2-way ANOVA followed by a Bonferroni post hoc test. \*\* $p < 0.01$ .

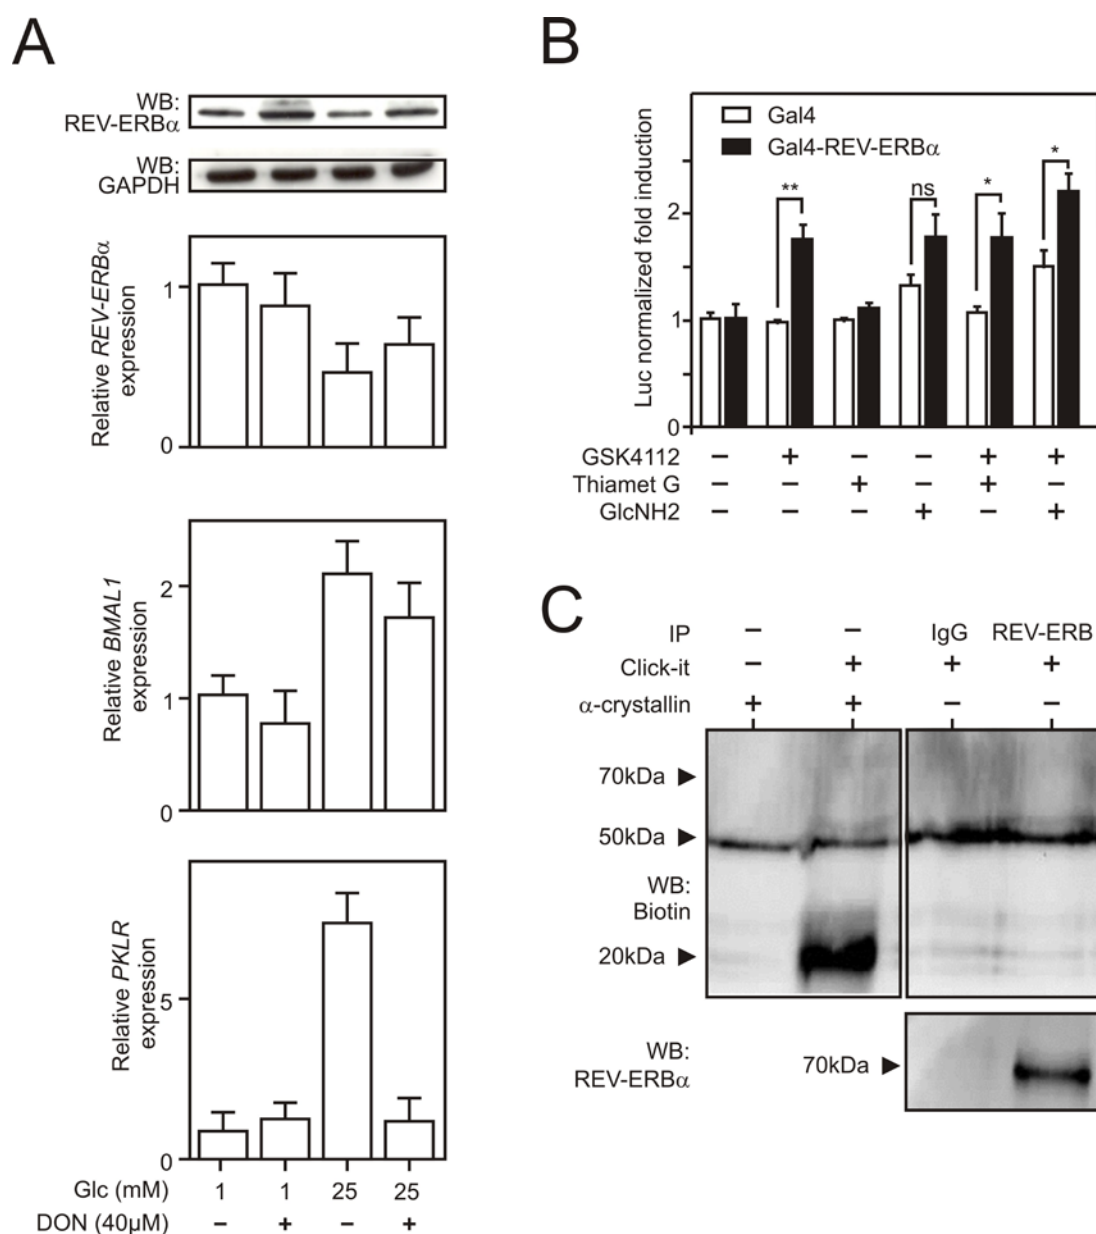

**Fig. S2, related to Figure 1: REV-ERB $\alpha$  is not O-GlcNAcylated.** A: HepG2 cells were cultured at 1 mM or 25 mM Glc and treated with 40  $\mu$ M DON for 24 hours. REV-ERB $\alpha$  protein level was determined by western blot (WB) (top panel). *REV-ERB $\alpha$* , *BMAL1* and *PKLR1* mRNAs were quantified using RT-qPCR (bottom panels). Data were expressed relative to mRNA amounts detected in control conditions (1mM Glc, no DON) arbitrarily set to 1. B: Mammalian 2-hybrid assay in HepG2 cells. After transfection with empty Gal4 or Gal4-REV-ERB $\alpha$  or VP16-NCOR expression vectors, Renilla normalization vector and luciferase-based reporter vector (pUAS-tk-Luc), cells were treated with 5  $\mu$ M Thiamet G or 20 mM glucosamine in the presence or absence of 10  $\mu$ M GSK 4112. Data were expressed relative to normalized RLU signals detected in control conditions (no treatment) arbitrarily set to 1. C: Click-it assay on immunoprecipitated REV-ERB $\alpha$  from HepG2 cell extracts or purified  $\alpha$ -crystallin. Modified O-GlcNAcylated residues were detected using biotin western-blotting (WB). The presence of REV-ERB $\alpha$  was confirmed using WB (lower panel). Histograms represent mean  $\pm$  SEM.

The statistical significance of differences was assessed by a 2-way ANOVA followed by a Bonferroni post hoc test. \* $p < 0.05$ , \*\* $p < 0.01$ .

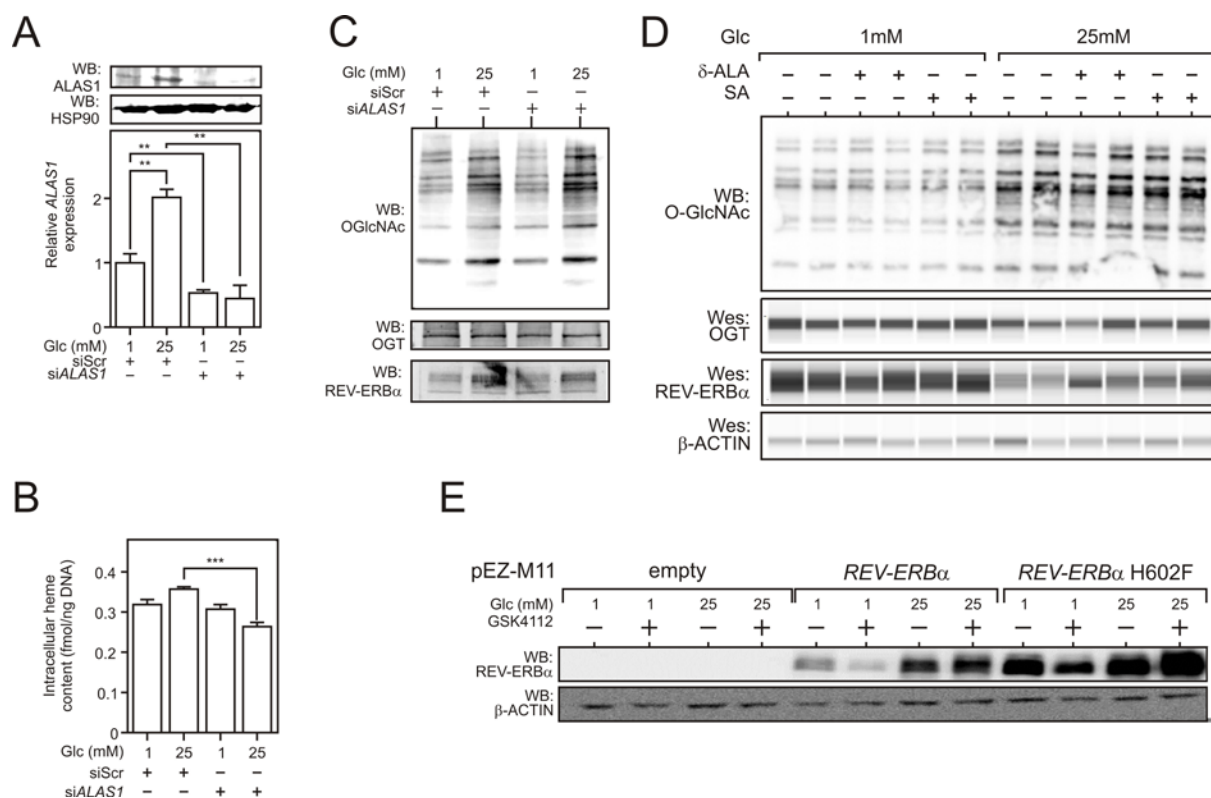

**Fig. S3, related to Figure 2: Reduction of intracellular heme production increases O-GlcNAcylation.** A: HepG2 cells were grown either in medium supplemented with 1 mM or 25 mM Glc and transfected either with a control siRNA (Scr) or with a siRNA targeting *ALAS1*. *ALAS1* knockdown was confirmed at the protein (top panel) and RNA (bottom panel) levels using western blot (WB) and RT-qPCR respectively. Data were expressed relative to RNA amount detected in siScr-transfected cells cultured in low Glc (1 mM) medium, which was arbitrarily set to 1. B: Determination of intracellular heme content after *ALAS1* knockdown. C: Protein O-GlcNAcylation, OGT and REV-ERBα protein levels in transfected HepG2 cells was determined by WB. D: O-GlcNAcylation, OGT and REV-ERBα protein levels after heme synthesis modulation in HepG2 cells treated with 0.1 mM δ-aminolevulinic acid (δ-ALA) or 0.5 mM succinylacetone (SA) at 1 mM or 25 mM Glc. E: REV-ERBα protein overexpression in HEK cells. REV-ERBα expression was assessed by WB. Cells were transfected with empty vector, *REV-ERBα* WT or *REV-ERBα* H602F mutant expression. Histograms represent mean  $\pm$  SEM. The statistical significance of differences was assessed by 2-way ANOVA followed by a Bonferroni post hoc test. \*\* $p < 0.01$ , \*\*\* $p < 0.001$ .

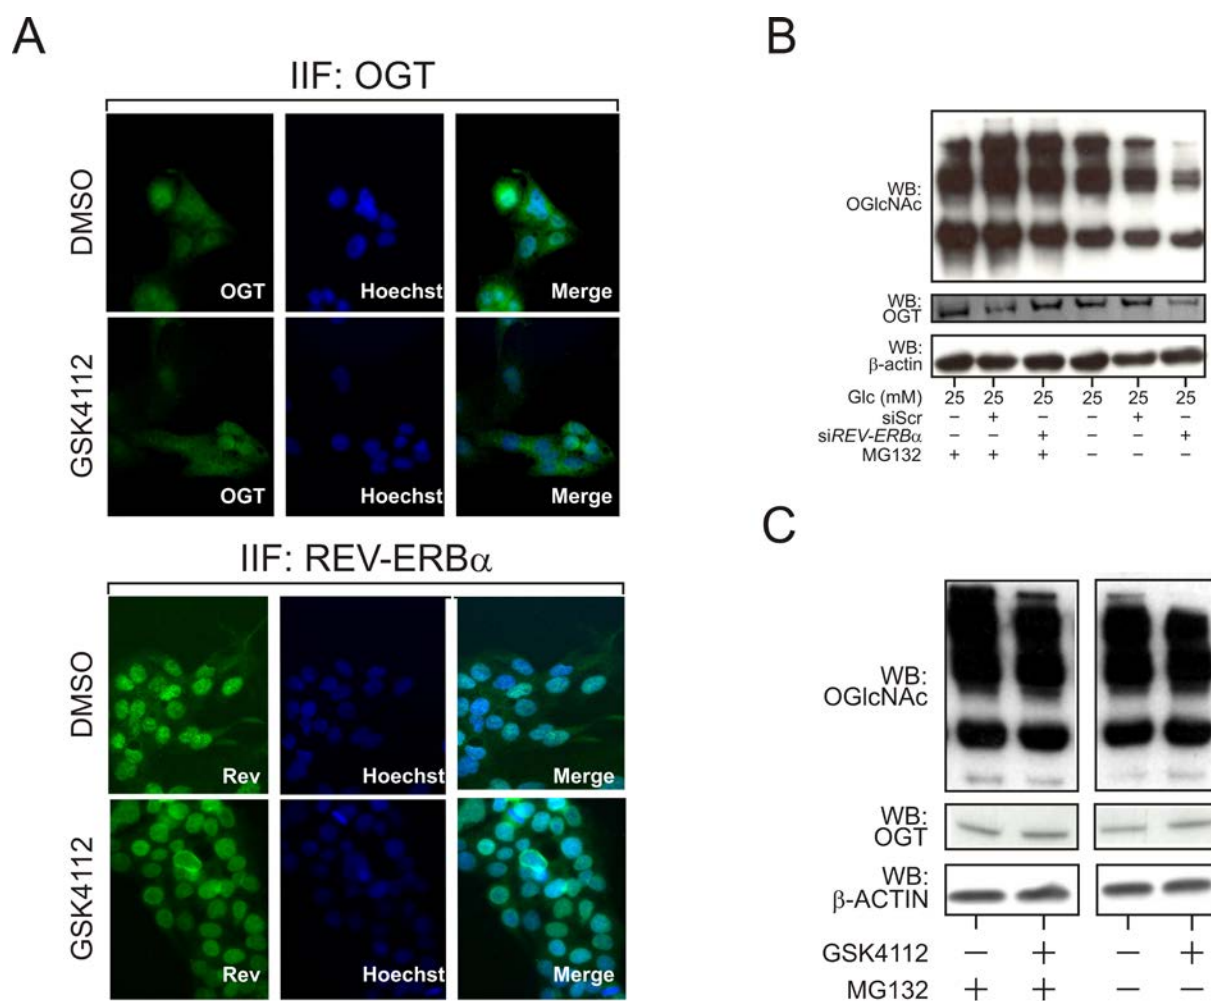

**Fig. S4, related to Figure 3: GSK4112 favours REV-ERB $\alpha$  nuclear accumulation.** A: Indirect immunofluorescence (IIF) detection of REV-ERB $\alpha$  and OGT in HepG2 cells cultured in 25 mM Glc and treated or not with 10  $\mu$ M GSK4112. B: Protein O-GlcNAcylation and OGT protein level in HepG2 whole cell extracts. Cells were grown in medium supplemented with 25 mM Glc, transfected with the indicated siRNAs and treated with 10  $\mu$ M GSK4112 in the presence or absence of 5  $\mu$ M MG132. Protein O-GlcNAcylation, OGT and REV-ERB $\alpha$  were detected by western blot (WB). C: Protein O-GlcNAcylation and OGT protein level in HepG2 whole cell extracts. Cells were grown in medium supplemented with 25 mM Glc and treated as indicated with 10  $\mu$ M GSK4112 in the presence or absence of 5  $\mu$ M MG132.

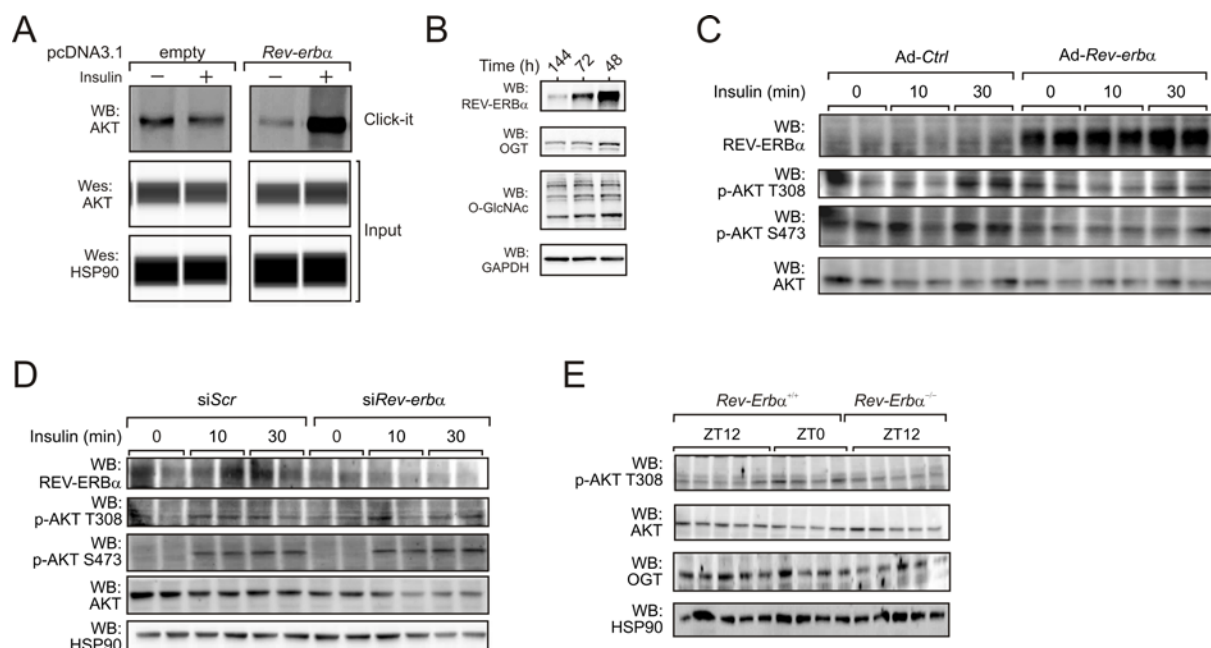

**Fig. S5, related to Figure 5: *REV-ERB $\alpha$*  expression level affects both OGT protein level and AKT phosphorylation.** A: AKT O-GlcNAcylation. HepG2 whole cell extracts were submitted to the Click-it chemical modification followed by streptavidin bead enrichment and AKT detection by western blotting (WB). Cells were co-transfected with AKT1 or REV-ERB $\alpha$  pcDNA3.1-based expression vectors. Twenty four hours after transfection, cells were maintained for 20 hours at 25 mM Glc without serum and treated for 10 min with 60 nM insulin. AKT and HSP90 (loading control) protein levels were determined by simple western (Wes). B: HepG2 cells were transduced with a *REV-ERB $\alpha$* -encoding adenovirus and cultured for 48, 72 or 144h. REV-ERB $\alpha$ , OGT and O-GlcNAcylation content were determined by WB analysis. C: T308 and S473 AKT phosphorylation was determined by WB analysis of HepG2 cellular extracts after transduction with control or *REV-ERB $\alpha$*  adenoviruses and treatment with 60 nM insulin for the indicated durations. D: HepG2 cells were transfected with siRNA (Ctrl and *REV-ERB $\alpha$* ) and treated with 60 nM insulin for the indicated durations. REV-ERB $\alpha$  and AKT phosphorylation (T308 and S473) were determined by WB. E: Hepatic OGT protein level and AKT T308 phosphorylation were determined by WB from ad libitum fed *Rev-erba* $^{+/+}$  (ZT12 and ZT0) and *Rev-erba* $^{-/-}$  (ZT12) mice.



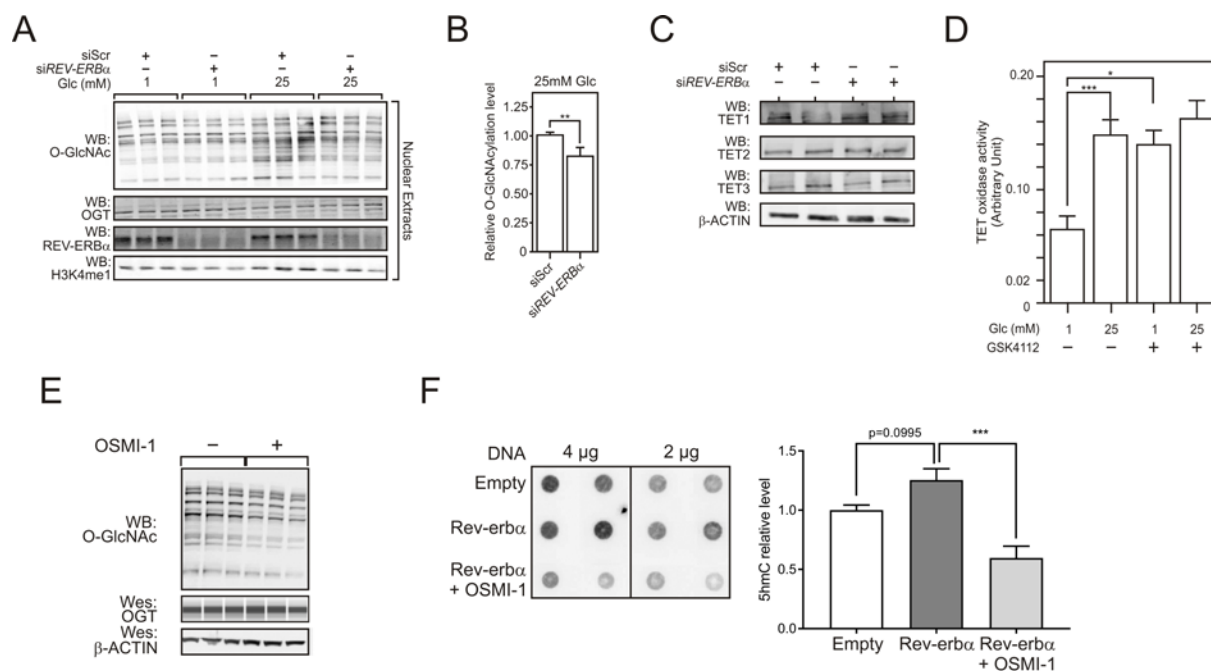

**Fig. S6, related to Figure 6: REV-ERBα does not control TETs expression level but controls TET enzymatic activity.** A: HepG2 nuclear protein O-GlcNAcylation, OGT and REV-ERBα protein levels were determined by western blotting (WB). Cells were transfected with siRNA [Scrambled (Scr) or targeting *REV-ERBα*] and incubated either at 1mM or 25mM Glc. A representative WB is shown. B: Densitometric quantification of nuclear protein O-GlcNAcylation in control or REV-ERBα-depleted cells in 25mM Glc. The statistical significance was determined by a one-way t-test (n=5). C: HepG2 cells were transfected with siRNA (Scr or targeting *REV-ERBα*). TET1, TET2 and TET3 protein levels were determined by WB. D: HepG2 cells were grown in 1 mM or 25 mM Glc and treated with 10 μM GSK 4112. TET oxidase activities were determined in HepG2 nuclear extracts. E: Protein O-GlcNAcylation and REV-ERBα expression were assayed by WB analysis in HepG2 cells grown at 1 mM Glc and treated or not overnight with the OGT inhibitor OSMI-1 (50 μM). F: HepG2 cells were transfected by control (empty) or *REV-ERBα*-encoding expression vectors. Cells were cultivated in 1 mM Glc and treated overnight with the OGT inhibitor OSMI-1 (50 μM) or vehicle (DMSO). DNA 5hmC content was assayed by dot blotting and quantified by densitometry. The statistical significance of differences was assessed by a 1-way ANOVA followed by a Bonferroni post hoc test \*p<0.05, \*\*p<0.01, \*\*\*p<0.001.

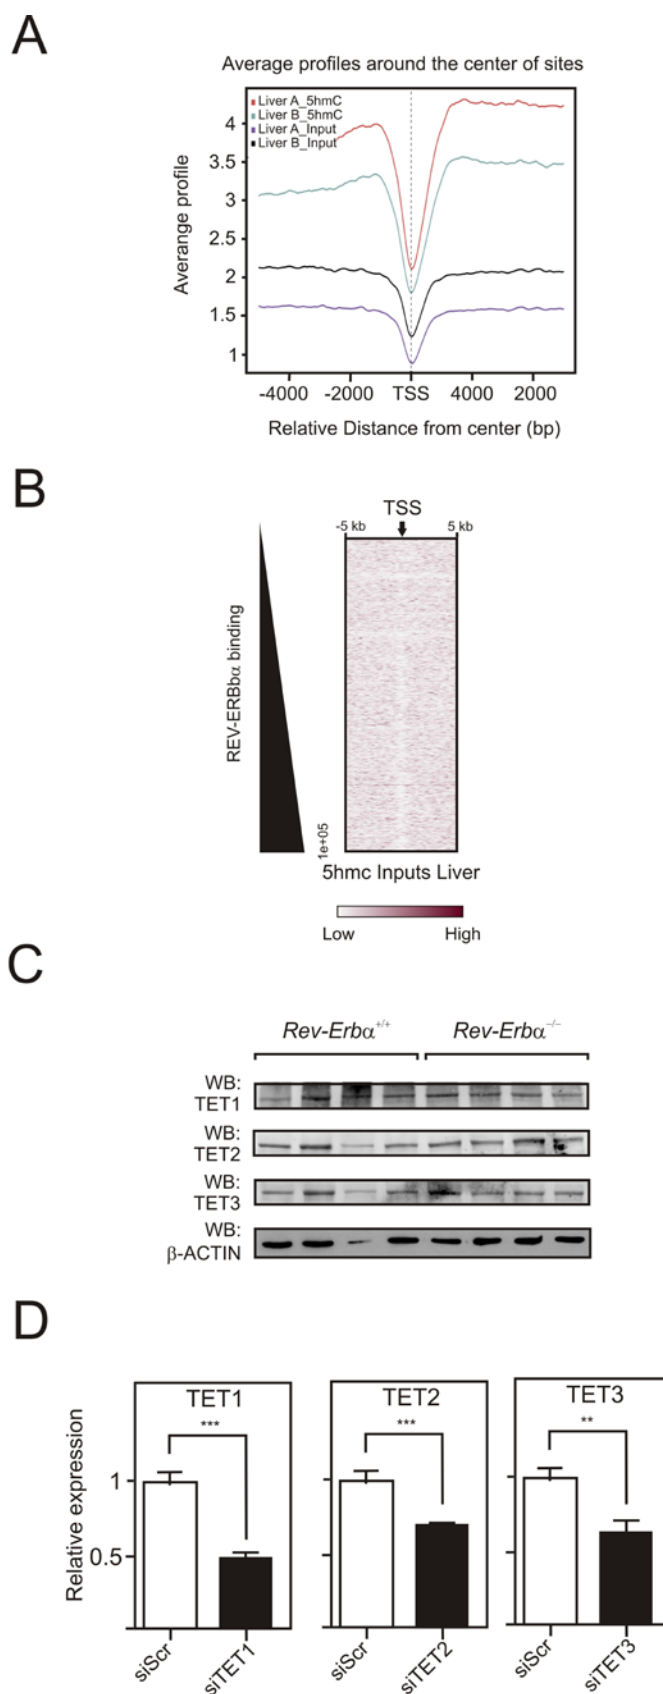

**Fig. S7 Epigenomic features of mouse liver DNA and TET expression in HepG2 cells, related to Figure 6:** A: Average 5hmC (red and green) and input (blue and black) ChIP-seq signal profiles on

Gencode Transcription Start Sites (TSS). TSS were aligned and regions extending 5 kb on each side were analyzed. B: Heatmaps represent input signal intensities in clusterized Gencode TSS. Gencode TSS (arrow) were aligned and extended 5 kb on each side. C: TET protein expression in *Rev-erb $\alpha$ <sup>-/-</sup>* and *Reverba<sup>+/+</sup>* mouse livers. Whole tissue extracts were analyzed by WB. D: Relative expression of *TET1*, *TET2* and *TET3* were determined by qPCR on siRNA(Scr, *TET1*, *TET2* or *TET3*)-transfected HepG2 cells. Histogram represents mean  $\pm$ SEM. The statistical significance was assessed by 2-way ANOVA followed by a Bonferroni post hoc test. \* $p < 0.05$ , \*\*\* $p < 0.001$ .

## SUPPLEMENTARY MATERIAL AND METHODS

### Rapid immunoprecipitation mass spectrometry of endogenous proteins (RIME)

RIME assay was performed as previously described (2). Briefly, 4 µg of rabbit monoclonal anti-REV-ERBα (#13418, Cell Signalling Technology), 10 µg of rabbit polyclonal anti-OGT (HPA030751, Sigma-Aldrich) or control rabbit IgG (sc-2027, Santa Cruz Biotechnology) were immobilized on SureBeads™ Protein A magnetic beads (Bio-Rad). HepG2 cells grown on P150 plates were cross-linked for 10 min with 1% formaldehyde at 37°C in DMEM. After quenching with 1.25 M glycine and nuclear protein extraction, samples were incubated overnight with immobilized antibodies at 4°C. Beads were washed with 1XRIPA buffer [50 mM HEPES (pH 7.6), 1 mM EDTA, 0.7% (v:v) sodium deoxycholate, 1% (v:v) NP-40 and 0.5 M LiCl] and then with 0.1 M ammonium hydrogen carbonate. Finally, beads were dried and flash frozen in liquid nitrogen, and LC-MS/MS analysis was performed to identify protein partners as follows. Tryptic digestion of bead-bound proteins was performed by adding 20 µL of trypsin (*Sus scrofa*, Promega) (10µg/mL in 50mM NH<sub>4</sub>HCO<sub>3</sub>) directly onto the washed beads. After brief vortexing, beads were incubated at 37°C overnight. Tubes were placed on a magnet to collect the supernatant which was directly placed into formic acid at a final concentration of 0.1%. Peptides were desalted with SPE (Ultra-Micro SpinColumn, Cole-Parmer, USA).

Tryptic digests were then analysed on a NanoAcquity (Waters) LC-system coupled to a Q-Exactive Plus orbitrap mass spectrometer (Thermo Fisher Scientific). The HPLC system consisted of a solvent degasser Nanoflow pump, a thermostated column oven kept at 60°C and a thermostated autosampler kept at 10°C. Mobile phase A (0.1% FA in water) and mobile phase B (0.1% FA in acetonitrile) were delivered at 450nL/min. Samples were loaded into a Symmetry C18 precolumn (0.18 x 20mm, 5 µm particle size, Waters) over 3 minutes in 1% B at a flow rate of 5µL/min. This step was followed by a reverse-phase separation using an ACQUITY UPLC® BEH130 C18 separation column (200 mm x 75 µm id, 1.7 µm particle size, Waters). Peptides were eluted using a gradient from 1 % to 8 % B over 2 minutes followed by an 8% to 25% B step in 88 minutes and finished by 25% to 90% B in 10 minutes. A 5 min plateau at 90% B was observed before column reconditioning at 1% B. The mass spectrometer was equipped with a nanospray ion source. The applied voltage was 1.8kV and the ion transfer tube temperature was set to 250°C. MS spectra were acquired at a resolution of 70,000 at 200m/z, an automatic gain control (AGC) was fixed at 3 x 10<sup>6</sup> ions and a max injection time was set at 50 msec under a full ratio fixed at 15%. Peptide fragmentation was performed via higher-energy collisional dissociation set at 27V of normalized collisional energy. The ten most intense peptide ions in each survey scan with a charge state ≥2 were selected for MS/MS in the mass range of 300 to 1800. MS/MS were performed at 17,500 resolution at 200m/z, AGC was fixed at 1 x 10<sup>5</sup> and the maximum injection time was set to 100 msec. Peaks selected for fragmentation were automatically put on a dynamic exclusion list for 10 s. MS data were saved in RAW file format (Thermo Fisher Scientific) using XCalibur and then converted into “.mgf” files using MSConvert (Proteowizard), which were then

submitted to the Mascot search engine (version 2.5.1, Matrix Science, London, UK) installed on a local server. Searches were performed against an in-house generated protein database composed of protein sequences of *Homo sapiens* extracted from Uniprot database (May 2016) and common contaminants (human keratins, trypsin), and combined with reverse sequences for all entries (total 299,458 entries) using an in-house database generation toolbox [<https://msda.unistra.fr> (3)]. Searches were performed without any molecular mass, or isoelectric point restrictions, trypsin was selected as enzyme, carbamidomethylation of cysteine (+57 Da) and oxidation of methionine (+16 Da) were set as variable modifications and mass tolerances on precursor and fragment ions of 5 ppm and 0.05 Da were used, respectively. Mascot results were loaded into the in-house Proline software (4) and filtered in order to obtain a false discovery rate of less than 1%.

### **RNA extraction and RT-QPCR**

Total RNA was isolated using Trizol (Life Technologies) according to the manufacturer's instructions. RNA quantity and purity were measured using a Nanodrop device (Thermo Fisher). Total RNA was treated with DNase I (Thermo Scientific) and reverse-transcribed into cDNA with the High Capacity cDNA reverse transcription kit (Applied Biosystems). Quantitative PCR were performed using the Brilliant III SYBR Green QPCR Master mix (Agilent) in a MX3005 qPCR system (Agilent). Settings were: step 1: 3 min at 95°C, step 2: 40 cycles of 5 sec at 95°C and 20 sec at 55°C.

### **Plasmid constructs and transient transfection experiments**

Wild type human *REV-ERB $\alpha$*  cDNA (NM\_021724) cloned into pEZ-M11 was purchased from GeneCopoeia. The pEZ-M11-REV-ERB $\alpha$  H602F construct was obtained by mutagenesis [QuickChange II Site-Directed Mutagenesis Kit (Agilent Technologies)] of the wild type vector following the supplier's recommendations to convert histidine 602 into a phenylalanine residue. The Gal4 DBD-REV-ERB $\alpha$  vector was built by cloning the sequence encoding the human ligand binding domain of REV-ERB $\alpha$  (from AA 216 to AA 614) into the pM backbone (Clontech). The Gal4-UAS tk Luc reporter gene and the pCMV NCoR RID-VP16 expression vector have been described elsewhere (5, 6). The Bmal-Luc vector was built by cloning the human Bmal1 promoter region (from -280 to +38) into pGL4 basic (Promega). The normalization vector pCMV-renilla was purchased from Promega. Detailed sequence information is available upon request. HepG2 cells ( $5 \times 10^5$ ) or HEK293 ( $3 \times 10^5$ ) were plated on 6-well plates and transfections were performed using JetPEI (Polyplus transfection). Twenty four hours after transfection, the medium was replaced by complete medium. Cells were treated or not with 10  $\mu$ M GSK4112 or vehicle (DMSO) for 24 hours. Reporter assays were quantified using the Dual-Glo<sup>®</sup> luciferase assay system (Promega) following the supplier's recommendations.

### Adenovirus transduction

Control and *REV-ERB $\alpha$*  adenovirus were purchased from Atlantic Gene Therapies. HepG2 cells were transduced in serum-free DMEM medium for 150 min. After a 48h incubation in complete DMEM medium, cells were washed with 1X PBS and incubated 24 hours in serum-free medium. Cells were then treated or not with 60 nM insulin for the indicated time.

### Small interfering RNAs (siRNA)

HepG2 cells were transfected for 48 h with Interferin (Polyplus transfection) with 10 nM of siRNAs targeting either *MGEA5/OGA*, *OGT*, *REV-ERB $\alpha$* , *REV-ERB $\beta$*  human transcripts or a scrambled control (siCtrl) sequence. SiRNAs were as follows: *REV-ERB $\alpha$* : Nr1d1 Silencer Validated siRNA (Ambion, ID: 5940), *REV-ERB $\beta$* : Nr1d2 Silencer Validated siRNA (Ambion, ID: 19380), *OGT*: On-target plus Smart pool siRNA (Dharmacon, ID: L-019111-00), *MGEA5*: On-target plus Smart pool siRNA (Dharmacon, ID: L-012805-00), *ALAS1*: On-target plus Smart pool siRNA (Dharmacon: ID: L-009276-01), Control: On-target plus Non-targeting pool (Dharmacon, ID: D-001810-10).

### Western blot analysis

Proteins were resolved by 10% SDS-PAGE under reducing conditions and transferred to nitrocellulose (Amersham GE Healthcare). Equal loading and transfer efficiency were confirmed by Ponceau red staining. Membranes were blocked for 1h with 5% bovine serum albumin in TRIS-buffered saline (TBS)-0.1% Tween. Membranes were incubated overnight at 4°C with appropriate antibodies described below. Membranes were then washed 3 times with TBS-Tween for 10min. and incubated for 1 h with either an anti-rabbit or an anti-mouse horseradish peroxidase-labelled secondary antibody (1:10,000). Membranes were washed 3 times with TBS-Tween for 10 min and antigen-antibodies complexes were detected by enhanced chemiluminescence (Pierce-Thermo Scientific). The following antibodies were used: mouse monoclonal anti-O-GlcNAc (RL2, ab2739, Abcam), rabbit polyclonal anti-OGT (O6014, Sigma-Aldrich), rabbit monoclonal anti-REV-ERB $\alpha$  (#13418, Cell Signalling Technology), rabbit polyclonal anti-HSP90 (sc-7947, Santa Cruz Biotechnology), Rabbit polyclonal anti-H2B (#12364), anti AKT (#9272), anti-P-AKT T308 (#13038), anti-P-AKT S473(#4030) [Cell Signalling Technology], Rabbit polyclonal anti-TET2 (GTX124205) and TET3 (GTX121453), mouse monoclonal anti-TET1 (GTX627420) [Gentex] and mouse monoclonal anti-Actin (A5441, Sigma-Aldrich). As membrane stripping could potentially remove proteins bound to the membrane, each WB analysis was performed on separately processed membrane.

### Simple Western immunoassays

Proteins were analysed by Simple Western<sup>®</sup> size-based assays using a Wes system as recommended by the manufacturer (ProteinSimple). Proteins (0.5 mg/mL) were detected with primary

antibodies described above. Secondary antibodies were provided by the manufacturer (PS-MK14, ProteinSimple). Samples were processed according to manufacturer's recommendations. Data were analyzed using the Compass software (ProteinSimple).

### **Subcellular fractionation**

HepG2 cells were harvested and washed twice with ice-cold 1x PBS. Cells were suspended into a hypotonic buffer [ca 10<sup>7</sup> cells/mL of 20 mM TRIS-HCl, pH 7.5, 10 mM NaCl, 3 mM MgCl<sub>2</sub>, 0.2% NP40 with protease and phosphatase inhibitors(Roche)] and homogenized with 20 strokes of a Dounce grinder (pestle A). Homogenates were spun at 600g for 5 min. and the supernatant (cytosol) was collected and stored in 10% glycerol until use. Pellets were suspended in 500 µL of lysis buffer (25 mM Tris-HCl, pH 7.5, 500 mM NaCl, 2 mM EDTA, 0.5% NP-40, and protease inhibitors) for 30 min at 4°C then sonicated for 10 min with a Bioruptor device at high power mode (sonication cycle: 30 sec ON/30 sec OFF). Lysates were centrifuged at 12,000 rpm for 5 min at 4°C. The soluble fraction (nucleoplasm) was collected and stored in 10% glycerol until use.

### **Immunocytochemistry**

Immunofluorescent detection of REV-ERB $\alpha$  and OGT was performed on paraformaldehyde-fixed HepG2 cells treated or not with 10 µM GSK4112 and cultured at high Glc concentration (25 mM). After a 24h-treatment, HepG2 cells were fixed with 4% formaldehyde and permeabilized with 0.1% Triton X100. Immuno-staining was processed with rabbit anti-REV-ERB $\alpha$  or mouse anti-OGT (ab184198, Abcam) monoclonal antibodies and FITC couple secondary antibodies. DNA was stained using the Hoechst 33,258 intercalating agent. Images were acquired using a Leica DMI6000B microscope.

### **TET enzyme activity assays**

TET enzymatic activity was assayed in the nuclear fraction of treated cells as follows. Cells were grown on P150 plates and washed twice using ice-cold 1xPBS and harvested in 1 mL ice-cold PBS. Cells were centrifuged at 600g for 2 min. The pellet was suspended into 200 µL buffer A (10 mM HEPES pH 7.9, 10 mM KCl, 1.5 mM MgCl<sub>2</sub>, 0.34 M sucrose, 10% glycerol) and incubated on ice for 10 min. After centrifugation at 1,300 rpm for 10 min, pellets were washed once with buffer A and suspended in 100 µL buffer B (10 mM HEPES pH 7.9, 10 mM KCl, 3 mM EDTA, 0.2 mM EGTA, 1 mM DTT) for 30 min. TET enzyme activity was measured with the Epigenase™ 5mC Hydroxylase TET Activity/Inhibition Assay kit (Epigentek) according to manufacturer's instructions.

### 5-hmC assay

The 5hmC content was determined as follows. HepG2 and mouse liver genomic DNA were extracted using the phenol/chloroform method after proteinase K and RNase treatment (7). HepG2 5hmC levels were determined using the MethylFlash™ hydroxymethylated DNA quantification kit (Epigentek) according to manufacturer's instructions. Mouse liver 5hmC level was determined using a dot blot assay. Briefly, 200 ng DNA were denatured in 0.1 M NaOH at 99°C for 5 min followed by cooling down at 4°C and a neutralization step with 0.66 M ammonium acetate. DNA was blotted on Hybond™-N+ membrane (Amersham GE Healthcare) and UV crosslinked. Hydroxymethylated DNA was detected using an anti-5hmC-DNA rabbit polyclonal antibody (1/1000, C15310210, Diagenode). Immuno-stained DNA was detected by enhanced chemiluminescence (Pierce-Thermo Scientific).

### Hydroxymethylated DNA immunoprecipitation (hMeDIP)

The hMeDIP assay was performed on mouse liver DNA using the hMeDIP kit (Diagenode) according to the manufacturer's instructions. Briefly, DNA was extracted with the phenol/chloroform method as above. Seven µg of purified DNA were sonicated for 4x10 min with a Bioruptor device at high power mode (sonication cycle: 30 sec ON/30 sec OFF) and heat-denatured (10 min at 95°C). After 5 min incubation on ice, hydroxymethylated DNA was immunoprecipitated with an anti-5hmC-DNA mouse monoclonal antibody bound to magnetic beads. After an overnight incubation, beads were washed and DNA (IPed and input) was treated with proteinase K and purified. The *Srebf1* hydroxymethylated region enrichment were then quantified by qPCR and compared to input.

### Immunoprecipitation assays

Immunoprecipitations were performed using the Crosslink Magnetic IP/Co-IP Kit (Pierce) according to manufacturer's instructions. Briefly, cells ( $2 \times 10^7$ ) were washed with 10 mL ice-cold 1x PBS then lysed on ice in 0.5 mL IP lysis buffer (25 mM TRIS-HCl pH7.4, 150 mM NaCl, 1 mM EDTA, 1% NP40 and 10% glycerol). Three µg of mouse monoclonal anti-FLAG antibody (M2; Sigma-Aldrich), rabbit monoclonal anti-REV-ERB $\alpha$  (#13418, Cell Signalling Technology) or rabbit polyclonal anti-OGT (HPA030751, Sigma-Aldrich) were crosslinked on magnetic beads. Immunoprecipitations were performed using 500 µg of protein samples. Bound proteins were eluted with elution buffer and analysed by WB as indicated.

### Mass spectrometry analysis of the HepG2 O-GlcNAcylome

REV-ERB $\alpha$ -specific and control siRNA treatments were performed in HepG2 cells. HepG2 cell extracts were immunoprecipitated with the anti O-GlcNAc antibody RL2. An aliquot from immunoprecipitates was separated by SDS-PAGE, and each band was cut into small pieces to perform in-gel tryptic digestion. Briefly, chopped gel pieces were washed three times with 25 mM



ammonium bicarbonate containing 50% (v/v) acetonitrile (ACN). Samples were dehydrated by ACN and dried for 10 min at 37°C. Reduction and alkylation of samples were performed by adding dithiothreitol and iodoacetamide, respectively. Then, gel pieces were rehydrated in a digestion buffer containing 50 mM ammonium bicarbonate and 10 ng/μL trypsin (Promega, sequencing grade). The rehydrated transparent gel pieces were placed into 50 mM ammonium bicarbonate, and then incubated overnight at 37°C. The digested products were extracted with 100 μL of 5% formic acid in 80% acetonitrile (v/v). The peptide solution was then dried completely by vacuum centrifugation.

In parallel, another aliquot of immunoprecipitated sample was used for label free quantification. The samples were treated with 0.5 M N-acetyl-D-glucosamine to elute bound proteins from beads. The supernatant was subjected to eFASP tryptic digestion. UF filters from Amicon® units (10 kDa cutoff limit; Millipore, Billerica, MA) were incubated overnight in 5% (v/v) TWEEN-20 (T20, Sigma-Aldrich). After incubation, the filter units were rinsed thoroughly by three immersions in MS-grade water. The eFASP digestion (8, 9) was as follows. Samples were mixed in 50 μL of reducing buffer [4% SDS, 0.2 % deoxycholic acid (DCA), 50 mM dithiothreitol (DTT), 200 mM NH<sub>4</sub>HCO<sub>3</sub>] overnight at 4°C, and then centrifuged at 13,000 g for 15 min at 20°C. Supernatants were mixed to 200 μL of SDS exchange buffer A (8 M urea, 0.2 % DCA, 100 mM NH<sub>4</sub>HCO<sub>3</sub>, pH 8), and transferred to Amicon® units and centrifuged at 13,000 g for 30 min. The filtrate was discarded, and 200 μL exchange buffer A were deposited on each filter unit which were centrifuged for 30 min. This wash/centrifugation step was repeated twice. Reduced proteins were then alkylated on the filter unit by addition of the alkylation buffer [8 M urea, 50 mM iodoacetamide (IAA), and 100 mM NH<sub>4</sub>HCO<sub>3</sub>, pH 8] and incubation at 37°C for 60 min with shaking in the dark. After centrifugation at 13,000 g for 30 min, the filtrate was discarded. To remove residual IAA, 200 μL of exchange buffer A was added to each filter unit and centrifuged. This buffer addition/centrifugation step was repeated once. Three washes with the eFASP digestion buffer (100 μL) (50 mM ABC, 0.2% DCA pH 8) were performed then 1 μg trypsin (1:50 w/w) was added. Digestion proceeded for 16 h at 37°C. Peptides were recovered by transferring the UF filter to a new collection tube and spinning at 13,000 g for 20 min. To achieve complete peptide recovery, filters were rinsed twice with 50 μL of 50 mM NH<sub>4</sub>HCO<sub>3</sub>. Ethyl acetate (200 μL) was added to the peptide-containing filtrate and was transferred to a 2 mL tube to which 2.5 μL TFA was added and quickly vortexed. White thread-like precipitates were visible for large quantities of peptides. Peptide precipitates were mixed with 800 μL of ethyl acetate and were centrifuged at 13,000 g for 10 min. The organic supernatant was discarded and this step was repeated twice. The aqueous phase was placed in a thermomixer at 60°C for 5 minutes to evaporate residual ethyl acetate and organic solvents and volatile salts were then removed by vacuum-drying. This step was repeated two times with 50% methanol. Samples were then diluted tenfold in buffer A of nano-HPLC (5% acetonitrile and 0.1% formic acid) and each sample (n = 4) was injected four times in HPLC instrument to be analyzed in triplicates. Peptides mixtures were analyzed using a nanoflow HPLC instrument (U3000 RSLC Thermo Fisher Scientific) coupled on-line to a quadrupole-Orbitrap mass spectrometer (Q Exactive Plus, Thermo Scientific) with a nano-electrospray ion source. One μL of peptide mixture (corresponding to 500 ng of proteins) was loaded onto the pre-concentration trap (Thermo Scientific, Acclaim PepMap100 C18, 5 μm, 300 μm i.d. × 5 mm) using partial loop injection, for 5 min at a 10 μL/min flow

rate with buffer A. Peptides were separated on analytical column (Acclaim PepMap100 C18, 3  $\mu\text{m}$ , 75 mm i.d.  $\times$  500 mm) with a linear gradient of 5–50% buffer B (75% acetonitrile and 0.1% formic acid) at a 250 nL/min flow rate and a 45 °C controlled temperature. The total time for a LC MS/MS run was about 180 min long. MS data were acquired in a top-20 data-dependent method dynamically choosing the most abundant precursor ions from the survey scan for HCD fragmentation. Dynamic exclusion duration was 60 s. Isolation of precursors was performed with a 1.6 m/z window and MS/MS scans were acquired with a starting mass of 80 m/z. Survey scans were acquired in the Orbitrap analyzer with mass range of 400–1600 m/z and 70,000 resolutions at m/z 400 (AGC set to  $10^6$  ions with a maximum fill time of 100 ms). Resolution for HCD spectra was set to 70,000 at m/z 200 (AGC set to  $10^5$  ions with a maximum fill time of 160 ms) and 28 eV normalized collision energy. The underfill ratio, which specifies the minimum percentage of the target value likely to be reached at maximum fill time, was defined as 0.4%. The instrument was run with peptide recognition mode (i.e. from 2 to 8 charges), exclusion of singly charged and of unassigned precursor ions enabled.

The acquired raw files were analysed with MaxQuant software (version 1.5.3.30) using the Andromeda search engine. Peptides and proteins were identified by using the mouse subset of the UniProt database (released 2017, 159,806 entries) supplemented with 517 contaminants sequences. The “target-decoy” search strategy was used for estimating the frequencies of incorrect protein identifications (FDR), based on a reverse database generated automatically in MaxQuant. The precursor mass and fragment mass were identified with an initial mass tolerance of 10 ppm and 20 ppm, respectively. The search included variable modifications of methionine oxidation, asparagine and glutamine deamidation, tyrosine, serine and threonine phosphorylation and N-terminal acetylation and glutamine to pyroglutamate conversion, and fixed modifications of carbamidomethyl cysteine and HexNAc serine and threonine. Minimal peptide length was set to six amino acids and a maximum of three mis-cleavages was allowed. The FDR was set to 0.01 for peptide and protein identifications. To maximize the number of quantification events across samples, MS runs from skeletal muscle were analysed with the “match between runs” option in the MaxQuant software, which allowed the quantification of high-resolution MS1 features that were not identified in each single measurement. This algorithm was enabled using a 60-sec retention time window for individual matching and a 20-min retention time window for complete alignment of the spectrum. In the case of identified peptides that are all shared between two proteins, these were combined and reported as one protein group. Moreover, proteins contaminants, proteins identified only based on variable modifications sites and proteins matching to the reverse decoy database were filtered out. LFQ intensities for respective protein groups were uploaded in Perseus (1.5.6.0) and analysed. Raw LFQ intensities were Log<sub>2</sub>-transformed. At least four LFQ values per protein group needed to be present for the analysis. To replace non-quantified values with low intensities, data imputation was performed based on normal distribution of LFQ intensities. Significant interactors were determined using a two-sample analysis multiple sample test with Benjamini-Hochberg FDR at 0.05.

### Click-it chemistry assay

REV-ERB $\alpha$  or IgG control immunoprecipitations from HepG2 whole cell extract were processed as follows. O-GlcNAcylation of bead-bound proteins or of  $\alpha$ -crystalline (positive control) was detected using the Click-iT<sup>®</sup>/O-GlcNAc Enzymatic Labeling System (Thermo Fisher Scientific) according to manufacturer's instructions. Signal detection was performed using the Click-iT<sup>™</sup> Biotin Protein Analysis Detection Kit (Thermo Fisher Scientific) according to manufacturer's instructions. For AKT O-GlcNAcylation detection, HepG2 cells were transfected with pEZ-M11 empty vector or pEZ-M11-REV-ERB $\alpha$ . Twenty four hours after transfection, cells were cultivated for 20 hours in 25 mM Glc-containing medium in absence of serum then treated for 10 min with 60 nM Insulin. O-GlcNAcylation detection was as previously described (10). Briefly, total proteins (200  $\mu$ g) were labelled using the Click-iT<sup>®</sup>/O-GlcNAc Enzymatic Labelling System. Modified proteins were then resuspended in Tris-HCl 50 mM, pH 8, SDS 1% buffer and diluted in enrichment buffer (PBS 1 X, Triton X100 1%, SDS 0.1%) and incubated for 20h at 4°C with streptavidin-coupled magnetic beads (Life Technologies). After 4 washes with enrichment buffer, proteins were eluted in 2x Laemmli buffer and AKT was detected by western blotting.

### ChIP seq data processing

Datasets corresponding to REV-ERB $\alpha$  ChIP-seq from ZT10 8/12-week-old C57BL/6 mouse liver [GSM647029(11)] and 5hmC-DNA ChIP-seq from 17-week-old C57BL/6 mouse liver [hMedIP\_liver A (GSM1633770) and Input\_liver A (GSM1633772)] (12) were downloaded from the GEO website. Gene transcription start site (TSS) coordinates (mm10, GENCODE VM4 basic) were downloaded from the UCSC Genome Browser (13). Analysis were performed using a customized local instance of Galaxy (14). The REV-ERB $\alpha$  ChIP-seq dataset was analysed as previously described (15). The wig files for 5hmC-DNA ChIP-seq data were converted to bigwig and lifted to mm10 using the liftOver tool from the UCSC Genome Browser web site. Functional regions of interest were defined as regions spanning 5kb in each direction around the center of TSS. The average ChIP-seq intensities were computed with SitePro (16) on these regions with a resolution of 50bp. The Heatmap tool (based on SitePro script) was used to cluster functional regions into 4 groups according the average signal intensity for all ChIP-seq data (setting « step » to 100bp and « saturation » to 0.01).

## REFERENCES

1. Woldt, E., Sebti, Y., Solt, L. A., Duhem, C., Lancel, S., Eeckhoutte, J., Hesselink, M. K., Paquet, C., Delhaye, S., Shin, Y. *et al.* (2013) Rev-erb- $\alpha$  modulates skeletal muscle oxidative capacity by regulating mitochondrial biogenesis and autophagy. *Nat. Med.* 19: 1039-1046.
2. Mohammed, H., Taylor, C., Brown, G. D., Papachristou, E. K., Carroll, J. S., & D'Santos, C. S. (2016) Rapid immunoprecipitation mass spectrometry of endogenous proteins (RIME) for analysis of chromatin complexes. *Nat. Protoc.* 11: 316-326.
3. Carapito, C., Burel, A., Guterl, P., Walter, A., Varrier, F., Bertile, F., & Van, D. A. (2014) MSDA, a proteomics software suite for in-depth Mass Spectrometry Data Analysis using grid computing. *Proteomics.* 14: 1014-1019.
4. Carapito, C., Lane, L., Benama, M., Opsomer, A., Mouton-Barbosa, E., Garrigues, L., Gonzalez de, P. A., Burel, A., Bruley, C., Gateau, A. *et al.* (2015) Computational and Mass-Spectrometry-Based Workflow for the Discovery and Validation of Missing Human Proteins: Application to Chromosomes 2 and 14. *J. Proteome. Res.* 14: 3621-3634.
5. Lien, F., Berthier, A., Bouchaert, E., Gheeraert, C., Alexandre, J., Porez, G., Prawitt, J., Dehondt, H., Ploton, M., Colin, S. *et al.* (2014) Metformin interferes with bile acid homeostasis through AMPK-FXR crosstalk. *J. Clin. Invest* 124: 1037-1051.
6. Berrabah, W., Aumercier, P., Gheeraert, C., Dehondt, H., Bouchaert, E., Alexandre, J., Ploton, M., Mazuy, C., Caron, S., Tailleux, A. *et al.* (2014) Glucose sensing O-GlcNAcylation pathway regulates the nuclear bile acid receptor farnesoid X receptor (FXR). *Hepatology* 59: 2022-2033.
7. Bachman, M., Uribe-Lewis, S., Yang, X., Williams, M., Murrell, A., & Balasubramanian, S. (2014) 5-Hydroxymethylcytosine is a predominantly stable DNA modification. *Nat. Chem.* 6: 1049-1055.
8. Wisniewski, J. R., Zougman, A., Nagaraj, N., & Mann, M. (2009) Universal sample preparation method for proteome analysis. *Nat. Methods* 6: 359-362.
9. Erde, J., Loo, R. R., & Loo, J. A. (2014) Enhanced FASP (eFASP) to increase proteome coverage and sample recovery for quantitative proteomic experiments. *J. Proteome. Res.* 13: 1885-1895.
10. Dehennaut, V., Slomianny, M. C., Page, A., Vercoutter-Edouart, A. S., Jesus, C., Michalski, J. C., Vilain, J. P., Bodart, J. F., & Lefebvre, T. (2008) Identification of structural and functional O-linked N-acetylglucosamine-bearing proteins in *Xenopus laevis* oocyte. *Mol. Cell Proteomics.* 7: 2229-2245.
11. Feng, D., Liu, T., Sun, Z., Bugge, A., Mullican, S. E., Alenghat, T., Liu, X. S., & Lazar, M. A. (2011) A circadian rhythm orchestrated by histone deacetylase 3 controls hepatic lipid metabolism. *Science* 331: 1315-1319.
12. Thomson, J. P., Fawkes, A., Ottaviano, R., Hunter, J. M., Shukla, R., Mjoseng, H. K., Clark, R., Coutts, A., Murphy, L., & Meehan, R. R. (2015) DNA immunoprecipitation semiconductor sequencing (DIP-SC-seq) as a rapid method to generate genome wide epigenetic signatures. *Sci. Rep.* 5: 9778.
13. Speir, M.L., Zweig, A.S., Rosenbloom, K.R., Raney, B.J., Paten, B., Nejad, P., Lee, B.T., Learned, K., Karolchik, D., Hinrichs, A.S. *et al.* (2016) The UCSC Genome Browser database: 2016 update. *Nucleic Acids Res.* 44(D1):D717-25.

14. Afgan, E., Baker, D., van den Beek, M., Blankenberg, D., Bouvier, D., Cech, M., Chilton, J., Clements, D., Coraor, N., Eberhard, C. *et al.* (2016) The Galaxy platform for accessible, reproducible and collaborative biomedical analyses: 2016 update. *Nucleic Acids Res.* 44: W3-W10.
15. Dubois-Chevalier, J., Dubois, V., Dehondt, H., Mazrooei, P., Mazuy, C., Serandour, A. A., Gheeraert, C., Guillaume, P., Bauge, E., Derudas, B. *et al.* (2017) The logic of transcriptional regulator recruitment architecture at cis-regulatory modules controlling liver functions. *Genome Res.* 27: 985-996.
16. Shin, H., Liu, T., Manrai, A. K., & Liu, X. S. (2009) CEAS: cis-regulatory element annotation system. *Bioinformatics.* 25: 2605-2606.

**SUPPLEMENTAL TABLES**

**Table S1, related to Figure 1A: REV-ERB $\alpha$  interacts with OGT.** List of most relevant nuclear REV-ERB $\alpha$ -interacting proteins identified by RIME of HepG2 whole cell extracts.

| Symbol | Description                                                                                                                | Protein set score   |        | UniProt accession number | Protein Name | Gene name                                      |
|--------|----------------------------------------------------------------------------------------------------------------------------|---------------------|--------|--------------------------|--------------|------------------------------------------------|
|        |                                                                                                                            | IP REV-ERB $\alpha$ | IP IgG |                          |              |                                                |
| HNRNPC | Heterogeneous nuclear ribonucleoproteins C1/C2<br>OS=Homo sapiens (Human)<br>GN=HNRNPC PE=1 SV=4                           | 491                 | 0      | P07910                   | HNRPC_HUMAN  | Heterogeneous nuclear ribonucleoproteins C1/C2 |
| -      | cDNA FLJ50838, highly similar to Apoptotic chromatin condensation inducer in the nucleus OS=Homo sapiens (Human) PE=2 SV=1 | 378                 | 0      | B4DQZ7                   | B4DQZ7_HUMAN | -                                              |
| DDX46  | Probable ATP-dependent RNA helicase DDX46<br>OS=Homo sapiens (Human)<br>GN=DDX46 PE=1 SV=2                                 | 202                 | 0      | Q7L014                   | DDX46_HUMAN  | Probable ATP-dependent RNA helicase DDX46      |
| NR1D1  | Nuclear receptor subfamily 1 group D member 1<br>OS=Homo sapiens (Human)<br>GN=NR1D1 PE=1 SV=1                             | 120                 | 0      | P20393                   | NR1D1_HUMAN  | Nuclear receptor subfamily 1 group D member 1  |
| ROCK2  | Rho-associated protein kinase 2 OS=Homo sapiens (Human) GN=ROCK2 PE=1 SV=4                                                 | 94                  | 0      | O75116                   | ROCK2_HUMAN  | Rho-associated protein kinase 2                |
| RPS3   | 40S ribosomal protein S3<br>OS=Homo sapiens (Human)<br>GN=RPS3 PE=1 SV=1                                                   | 88                  | 0      | H0YF32                   | H0YF32_HUMAN | -                                              |
| RDX    | Radixin OS=Homo sapiens (Human) GN=RDX PE=1 SV=1                                                                           | 77                  | 0      | P35241                   | RADI_HUMAN   | Radixin                                        |
| -      | cDNA FLJ54018, highly similar to PDZ and LIM domain protein 5 OS=Homo sapiens (Human) PE=2 SV=1                            | 75                  | 0      | B7Z481                   | B7Z481_HUMAN | -                                              |
| LAD1   | Ladinin-1 OS=Homo sapiens (Human) GN=LAD1 PE=1 SV=2                                                                        | 72                  | 0      | O00515                   | LAD1_HUMAN   | Ladinin-1                                      |
| HSPA4  | Heat shock 70 kDa protein 4<br>OS=Homo sapiens (Human)<br>GN=HSPA4 PE=1 SV=4                                               | 70                  | 0      | P34932                   | HSP74_HUMAN  | Heat shock 70 kDa protein 4                    |
| PSMC2  | 26S protease regulatory subunit 7 OS=Homo sapiens (Human) GN=PSMC2 PE=1 SV=3                                               | 69                  | 0      | P35998                   | PRS7_HUMAN   | 26S protease regulatory subunit 7              |
| SUMO1  | Small ubiquitin-related modifier 1 OS=Homo sapiens (Human) GN=SUMO1 PE=1                                                   | 63                  | 0      | P63165                   | SUMO1_HUMAN  | Small ubiquitin-related modifier 1             |

|          |                                                                                            |    |   |        |             |                                               |
|----------|--------------------------------------------------------------------------------------------|----|---|--------|-------------|-----------------------------------------------|
|          | SV=1                                                                                       |    |   |        |             |                                               |
| NUP88    | Nuclear pore complex protein Nup88 OS=Homo sapiens (Human) GN=NUP88 PE=1 SV=2              | 61 | 0 | Q99567 | NUP88_HUMAN | Nuclear pore complex protein Nup88            |
| HDAC1    | Histone deacetylase 1 OS=Homo sapiens (Human) GN=HDAC1 PE=1 SV=1                           | 59 | 0 | Q13547 | HDAC1_HUMAN | Histone deacetylase 1                         |
| SEPT11   | Septin-11 OS=Homo sapiens (Human) GN=SEPT11 PE=1 SV=3                                      | 57 | 0 | Q9NVA2 | SEP11_HUMAN | Septin-11                                     |
| CCDC47   | Coiled-coil domain-containing protein 47 OS=Homo sapiens (Human) GN=CCDC47 PE=1 SV=1       | 53 | 0 | Q96A33 | CCD47_HUMAN | Coiled-coil domain-containing protein 47      |
| RPL30    | 60S ribosomal protein L30 OS=Homo sapiens (Human) GN=RPL30 PE=1 SV=2                       | 52 | 0 | P62888 | RL30_HUMAN  | 60S ribosomal protein L30                     |
| LMAN1    | Protein ERGIC-53 OS=Homo sapiens (Human) GN=LMAN1 PE=1 SV=2                                | 52 | 0 | P49257 | LMAN1_HUMAN | Protein ERGIC-53                              |
| PPP1R12A | Protein phosphatase 1 regulatory subunit 12A OS=Homo sapiens (Human) GN=PPP1R12A PE=1 SV=1 | 51 | 0 | O14974 | MYPT1_HUMAN | Protein phosphatase 1 regulatory subunit 12A  |
| SCRIB    | Protein scribble homolog OS=Homo sapiens (Human) GN=SCRIB PE=1 SV=4                        | 50 | 0 | Q14160 | SCRIB_HUMAN | Protein scribble homolog                      |
| WHSC1    | Histone-lysine N-methyltransferase NSD2 OS=Homo sapiens (Human) GN=WHSC1 PE=1 SV=1         | 50 | 0 | O96028 | NSD2_HUMAN  | Histone-lysine N-methyltransferase NSD2       |
| PTBP3    | Polypyrimidine tract-binding protein 3 OS=Homo sapiens (Human) GN=PTBP3 PE=1 SV=2          | 49 | 0 | O95758 | PTBP3_HUMAN | Polypyrimidine tract-binding protein 3        |
| ZC3H18   | Zinc finger CCCH domain-containing protein 18 OS=Homo sapiens (Human) GN=ZC3H18 PE=1 SV=2  | 48 | 0 | Q86VM9 | ZCH18_HUMAN | Zinc finger CCCH domain-containing protein 18 |
| USP14    | Ubiquitin carboxyl-terminal hydrolase 14 OS=Homo sapiens (Human) GN=USP14 PE=1 SV=3        | 48 | 0 | P54578 | UBP14_HUMAN | Ubiquitin carboxyl-terminal hydrolase 14      |
| SERPINH1 | Serpin H1 OS=Homo sapiens (Human) GN=SERPINH1 PE=1 SV=2                                    | 48 | 0 | P50454 | SERPH_HUMAN | Serpin H1                                     |
| CD3EAP   | DNA-directed RNA polymerase I subunit RPA34 OS=Homo sapiens (Human) GN=CD3EAP PE=1 SV=1    | 47 | 0 | O15446 | RPA34_HUMAN | DNA-directed RNA polymerase I subunit RPA34   |
| EHMT2    | Histone-lysine N-methyltransferase EHMT2 OS=Homo sapiens (Human) GN=EHMT2 PE=1 SV=3        | 47 | 0 | Q96KQ7 | EHMT2_HUMAN | Histone-lysine N-methyltransferase EHMT2      |



|          |                                                                                                           |    |   |        |              |                                                               |
|----------|-----------------------------------------------------------------------------------------------------------|----|---|--------|--------------|---------------------------------------------------------------|
| CFDP1    | Craniofacial development protein 1 OS=Homo sapiens (Human) GN=CFDP1 PE=1 SV=1                             | 46 | 0 | Q9UEE9 | CFDP1_HUMAN  | Craniofacial development protein 1                            |
| PDXDC1   | Pyridoxal-dependent decarboxylase domain-containing protein 1 OS=Homo sapiens (Human) GN=PDXDC1 PE=1 SV=2 | 45 | 0 | Q6P996 | PDXD1_HUMAN  | Pyridoxal-dependent decarboxylase domain-containing protein 1 |
| SAMHD1   | Deoxynucleoside triphosphate triphosphohydrolase SAMHD1 OS=Homo sapiens (Human) GN=SAMHD1 PE=1 SV=2       | 45 | 0 | Q9Y3Z3 | SAMH1_HUMAN  | Deoxynucleoside triphosphate triphosphohydrolase SAMHD1       |
| IPO9     | Importin-9 OS=Homo sapiens (Human) GN=IPO9 PE=1 SV=3                                                      | 43 | 0 | Q96P70 | IPO9_HUMAN   | Importin-9                                                    |
| UBB      | Polyubiquitin-B OS=Homo sapiens (Human) GN=UBB PE=1 SV=1                                                  | 42 | 0 | P0CG47 | UBB_HUMAN    | Polyubiquitin-B                                               |
| NAP1L4   | Nucleosome assembly protein 1-like 4 OS=Homo sapiens (Human) GN=NAP1L4 PE=1 SV=1                          | 42 | 0 | Q99733 | NP1L4_HUMAN  | Nucleosome assembly protein 1-like 4                          |
| HIST1H3A | Histone H3.1 OS=Homo sapiens (Human) GN=HIST1H3A PE=1 SV=2                                                | 41 | 0 | P68431 | H31_HUMAN    | Histone H3.1                                                  |
| SIN3A    | Paired amphipathic helix protein Sin3a OS=Homo sapiens (Human) GN=SIN3A PE=1 SV=2                         | 40 | 0 | Q96ST3 | SIN3A_HUMAN  | Paired amphipathic helix protein Sin3a                        |
| SEN3     | Sentrin-specific protease 3 OS=Homo sapiens (Human) GN=SEN3 PE=1 SV=2                                     | 40 | 0 | Q9H4L4 | SEN3_HUMAN   | Sentrin-specific protease 3                                   |
| CORO1B   | Coronin-1B OS=Homo sapiens (Human) GN=CORO1B PE=1 SV=1                                                    | 40 | 0 | Q9BR76 | COR1B_HUMAN  | Coronin-1B                                                    |
| -        | Adenylyl cyclase-associated protein OS=Homo sapiens (Human) PE=2 SV=1                                     | 40 | 0 | B2RDY9 | B2RDY9_HUMAN | -                                                             |
| TDP2     | Tyrosyl-DNA phosphodiesterase 2 OS=Homo sapiens (Human) GN=TDP2 PE=1 SV=1                                 | 38 | 0 | O95551 | TYDP2_HUMAN  | Tyrosyl-DNA phosphodiesterase 2                               |
| FARSB    | Phenylalanine--tRNA ligase beta subunit OS=Homo sapiens (Human) GN=FARSB PE=1 SV=3                        | 38 | 0 | Q9NSD9 | SYFB_HUMAN   | Phenylalanine--tRNA ligase beta subunit                       |
| AP3D1    | AP-3 complex subunit delta-1 OS=Homo sapiens (Human) GN=AP3D1 PE=1 SV=1                                   | 38 | 0 | O14617 | AP3D1_HUMAN  | AP-3 complex subunit delta-1                                  |
| PSMD14   | 26S proteasome non-ATPase regulatory subunit 14 OS=Homo sapiens (Human) GN=PSMD14 PE=1 SV=1               | 38 | 0 | O00487 | PSDE_HUMAN   | 26S proteasome non-ATPase regulatory subunit 14               |
| IWS1     | Protein IWS1 homolog OS=Homo sapiens (Human)                                                              | 36 | 0 | Q96ST2 | IWS1_HUMAN   | Protein IWS1 homolog                                          |

|         |                                                                                               |    |   |        |             |                                                   |
|---------|-----------------------------------------------------------------------------------------------|----|---|--------|-------------|---------------------------------------------------|
|         | GN=IWS1 PE=1 SV=2                                                                             |    |   |        |             |                                                   |
| RPS27L  | 40S ribosomal protein S27-like OS=Homo sapiens (Human) GN=RPS27L PE=1 SV=3                    | 36 | 0 | Q71UM5 | RS27L_HUMAN | 40S ribosomal protein S27-like                    |
| TRMT1L  | TRMT1-like protein OS=Homo sapiens (Human) GN=TRMT1L PE=1 SV=2                                | 35 | 0 | Q7Z2T5 | TRM1L_HUMAN | TRMT1-like protein                                |
| SEC11A  | Signal peptidase complex catalytic subunit SEC11A OS=Homo sapiens (Human) GN=SEC11A PE=1 SV=1 | 35 | 0 | P67812 | SC11A_HUMAN | Signal peptidase complex catalytic subunit SEC11A |
| SBDS    | Ribosome maturation protein SBDS OS=Homo sapiens (Human) GN=SBDS PE=1 SV=4                    | 35 | 0 | Q9Y3A5 | SBDS_HUMAN  | Ribosome maturation protein SBDS                  |
| PINX1   | PIN2/TERF1-interacting telomerase inhibitor 1 OS=Homo sapiens (Human) GN=PINX1 PE=1 SV=2      | 35 | 0 | Q96BK5 | PINX1_HUMAN | PIN2/TERF1-interacting telomerase inhibitor 1     |
| SKP1    | S-phase kinase-associated protein 1 OS=Homo sapiens (Human) GN=SKP1 PE=1 SV=2                 | 34 | 0 | P63208 | SKP1_HUMAN  | S-phase kinase-associated protein 1               |
| PSMB6   | Proteasome subunit beta type-6 OS=Homo sapiens (Human) GN=PSMB6 PE=1 SV=4                     | 34 | 0 | P28072 | PSB6_HUMAN  | Proteasome subunit beta type-6                    |
| NELFCD  | Negative elongation factor C/D OS=Homo sapiens (Human) GN=NELFCD PE=1 SV=2                    | 33 | 0 | Q81XH7 | NELFD_HUMAN | Negative elongation factor C/D                    |
| CORO1A  | Coronin-1A OS=Homo sapiens (Human) GN=CORO1A PE=1 SV=4                                        | 33 | 0 | P31146 | COR1A_HUMAN | Coronin-1A                                        |
| CTR9    | RNA polymerase-associated protein CTR9 homolog OS=Homo sapiens (Human) GN=CTR9 PE=1 SV=1      | 33 | 0 | Q6PD62 | CTR9_HUMAN  | RNA polymerase-associated protein CTR9 homolog    |
| PHIP    | PH-interacting protein OS=Homo sapiens (Human) GN=PHIP PE=1 SV=2                              | 32 | 0 | Q8WWQ0 | PHIP_HUMAN  | PH-interacting protein                            |
| PRPF38A | Pre-mRNA-splicing factor 38A OS=Homo sapiens (Human) GN=PRPF38A PE=1 SV=1                     | 32 | 0 | Q8NAV1 | PR38A_HUMAN | Pre-mRNA-splicing factor 38A                      |
| CBX5    | Chromobox protein homolog 5 OS=Homo sapiens (Human) GN=CBX5 PE=1 SV=1                         | 32 | 0 | P45973 | CBX5_HUMAN  | Chromobox protein homolog 5                       |
| TRIM27  | Zinc finger protein RFP OS=Homo sapiens (Human) GN=TRIM27 PE=1 SV=1                           | 32 | 0 | P14373 | TRI27_HUMAN | Zinc finger protein RFP                           |
| PCIF1   | Phosphorylated CTD-interacting factor 1 OS=Homo sapiens (Human) GN=PCIF1 PE=1 SV=1            | 31 | 0 | Q9H4Z3 | PCIF1_HUMAN | Phosphorylated CTD-interacting factor 1           |

|         |                                                                                                                                |    |   |        |             |                                                                                   |
|---------|--------------------------------------------------------------------------------------------------------------------------------|----|---|--------|-------------|-----------------------------------------------------------------------------------|
| ARAP1   | Arf-GAP with Rho-GAP domain, ANK repeat and PH domain-containing protein 1 OS=Homo sapiens (Human) GN=ARAP1 PE=1 SV=3          | 30 | 0 | Q96P48 | ARAP1_HUMAN | Arf-GAP with Rho-GAP domain, ANK repeat and PH domain-containing protein 1        |
| GNL1    | Guanine nucleotide-binding protein-like 1 OS=Homo sapiens (Human) GN=GNL1 PE=1 SV=2                                            | 30 | 0 | P36915 | GNL1_HUMAN  | Guanine nucleotide-binding protein-like 1                                         |
| CWC22   | Pre-mRNA-splicing factor CWC22 homolog OS=Homo sapiens (Human) GN=CWC22 PE=1 SV=3                                              | 30 | 0 | Q9HCG8 | CWC22_HUMAN | Pre-mRNA-splicing factor CWC22 homolog                                            |
| KATNAL2 | Katanin p60 ATPase-containing subunit A-like 2 OS=Homo sapiens (Human) GN=KATNAL2 PE=2 SV=3                                    | 30 | 0 | Q8IYT4 | KATL2_HUMAN | Katanin p60 ATPase-containing subunit A-like 2                                    |
| GTF3C5  | General transcription factor 3C polypeptide 5 OS=Homo sapiens (Human) GN=GTF3C5 PE=1 SV=2                                      | 29 | 0 | Q9Y5Q8 | TF3C5_HUMAN | General transcription factor 3C polypeptide 5                                     |
| SETD1A  | Histone-lysine N-methyltransferase SETD1A OS=Homo sapiens (Human) GN=SETD1A PE=1 SV=3                                          | 29 | 0 | O15047 | SET1A_HUMAN | Histone-lysine N-methyltransferase SETD1A                                         |
| CLU     | Clusterin OS=Homo sapiens (Human) GN=CLU PE=1 SV=1                                                                             | 28 | 0 | P10909 | CLUS_HUMAN  | Clusterin                                                                         |
| NCAPD2  | Condensin complex subunit 1 OS=Homo sapiens (Human) GN=NCAPD2 PE=1 SV=3                                                        | 28 | 0 | Q15021 | CND1_HUMAN  | Condensin complex subunit 1                                                       |
| ZMYND8  | Protein kinase C-binding protein 1 OS=Homo sapiens (Human) GN=ZMYND8 PE=1 SV=2                                                 | 28 | 0 | Q9ULU4 | PKCB1_HUMAN | Protein kinase C-binding protein 1                                                |
| GTF2H2  | General transcription factor IIH subunit 2 OS=Homo sapiens (Human) GN=GTF2H2 PE=1 SV=1                                         | 28 | 0 | Q13888 | TF2H2_HUMAN | General transcription factor IIH subunit 2                                        |
| CIT     | Citron Rho-interacting kinase OS=Homo sapiens (Human) GN=CIT PE=1 SV=2                                                         | 28 | 0 | O14578 | CTRO_HUMAN  | Citron Rho-interacting kinase                                                     |
| IRF2BP1 | Interferon regulatory factor 2-binding protein 1 OS=Homo sapiens (Human) GN=IRF2BP1 PE=1 SV=1                                  | 28 | 0 | Q8IU81 | I2BP1_HUMAN | Interferon regulatory factor 2-binding protein 1                                  |
| ATRX    | Transcriptional regulator ATRX OS=Homo sapiens (Human) GN=ATRX PE=1 SV=5                                                       | 28 | 0 | P46100 | ATRX_HUMAN  | Transcriptional regulator ATRX                                                    |
| PPP2R1A | Serine/threonine-protein phosphatase 2A 65 kDa regulatory subunit A alpha isoform OS=Homo sapiens (Human) GN=PPP2R1A PE=1 SV=4 | 27 | 0 | P30153 | 2AAA_HUMAN  | Serine/threonine-protein phosphatase 2A 65 kDa regulatory subunit A alpha isoform |
| CORO1C  | Coronin-1C OS=Homo sapiens (Human)                                                                                             | 27 | 0 | Q9ULV4 | COR1C_HUMAN | Coronin-1C                                                                        |

|        |                                                                                                              |    |   |        |             |                                                                   |
|--------|--------------------------------------------------------------------------------------------------------------|----|---|--------|-------------|-------------------------------------------------------------------|
|        | GN=CORO1C PE=1 SV=1                                                                                          |    |   |        |             |                                                                   |
| UPF1   | Regulator of nonsense transcripts 1 OS=Homo sapiens (Human) GN=UPF1 PE=1 SV=2                                | 27 | 0 | Q92900 | RENT1_HUMAN | Regulator of nonsense transcripts 1                               |
| TLN2   | Talin-2 OS=Homo sapiens (Human) GN=TLN2 PE=1 SV=4                                                            | 27 | 0 | Q9Y4G6 | TLN2_HUMAN  | Talin-2                                                           |
| ANP32A | Acidic leucine-rich nuclear phosphoprotein 32 family member A OS=Homo sapiens (Human) GN=ANP32A PE=1 SV=1    | 27 | 0 | P39687 | AN32A_HUMAN | Acidic leucine-rich nuclear phosphoprotein 32 family member A     |
| BPNT1  | 3'(2'),5'-bisphosphate nucleotidase 1 OS=Homo sapiens (Human) GN=BPNT1 PE=1 SV=1                             | 27 | 0 | O95861 | BPNT1_HUMAN | 3'(2'),5'-bisphosphate nucleotidase 1                             |
| CUL2   | Cullin-2 OS=Homo sapiens (Human) GN=CUL2 PE=1 SV=2                                                           | 26 | 0 | Q13617 | CUL2_HUMAN  | Cullin-2                                                          |
| NMT1   | Glycylpeptide N-tetradecanoyltransferase 1 OS=Homo sapiens (Human) GN=NMT1 PE=1 SV=2                         | 26 | 0 | P30419 | NMT1_HUMAN  | Glycylpeptide N-tetradecanoyltransferase 1                        |
| GSPT1  | Eukaryotic peptide chain release factor GTP-binding subunit ERF3A OS=Homo sapiens (Human) GN=GSPT1 PE=1 SV=1 | 26 | 0 | P15170 | ERF3A_HUMAN | Eukaryotic peptide chain release factor GTP-binding subunit ERF3A |
| DUSP3  | Dual specificity protein phosphatase 3 OS=Homo sapiens (Human) GN=DUSP3 PE=1 SV=1                            | 26 | 0 | P51452 | DUS3_HUMAN  | Dual specificity protein phosphatase 3                            |
| AP2B1  | AP-2 complex subunit beta OS=Homo sapiens (Human) GN=AP2B1 PE=1 SV=1                                         | 25 | 0 | P63010 | AP2B1_HUMAN | AP-2 complex subunit beta                                         |
| CAPNS1 | Calpain small subunit 1 OS=Homo sapiens (Human) GN=CAPNS1 PE=1 SV=1                                          | 24 | 0 | P04632 | CPNS1_HUMAN | Calpain small subunit 1                                           |
| CARM1  | Histone-arginine methyltransferase CARM1 OS=Homo sapiens (Human) GN=CARM1 PE=1 SV=3                          | 24 | 0 | Q86X55 | CARM1_HUMAN | Histone-arginine methyltransferase CARM1                          |
| OTUB1  | Ubiquitin thioesterase OTUB1 OS=Homo sapiens (Human) GN=OTUB1 PE=1 SV=2                                      | 24 | 0 | Q96FW1 | OTUB1_HUMAN | Ubiquitin thioesterase OTUB1                                      |
| RPP38  | Ribonuclease P protein subunit p38 OS=Homo sapiens (Human) GN=RPP38 PE=1 SV=2                                | 24 | 0 | P78345 | RPP38_HUMAN | Ribonuclease P protein subunit p38                                |
| KIF2A  | Kinesin-like protein KIF2A OS=Homo sapiens (Human) GN=KIF2A PE=1 SV=3                                        | 24 | 0 | O00139 | KIF2A_HUMAN | Kinesin-like protein KIF2A                                        |
| TBL1X  | F-box-like/WD repeat-containing protein TBL1X OS=Homo sapiens (Human)                                        | 24 | 0 | O60907 | TBL1X_HUMAN | F-box-like/WD repeat-containing protein TBL1X                     |

|        |                                                                                                                                            |    |   |        |              |                                                                                             |
|--------|--------------------------------------------------------------------------------------------------------------------------------------------|----|---|--------|--------------|---------------------------------------------------------------------------------------------|
|        | GN=TBL1X PE=1 SV=3                                                                                                                         |    |   |        |              |                                                                                             |
| CKB    | Creatine kinase B-type<br>OS=Homo sapiens (Human)<br>GN=CKB PE=1 SV=1                                                                      | 24 | 0 | P12277 | KCRB_HUMAN   | Creatine kinase B-type                                                                      |
| SNRPB2 | U2 small nuclear<br>ribonucleoprotein B"<br>OS=Homo sapiens (Human)<br>GN=SNRPB2 PE=1 SV=1                                                 | 23 | 0 | P08579 | RU2B_HUMAN   | U2 small nuclear<br>ribonucleoprotein B"                                                    |
| RAE1   | mRNA export factor<br>OS=Homo sapiens (Human)<br>GN=RAE1 PE=1 SV=1                                                                         | 23 | 0 | P78406 | RAE1L_HUMAN  | mRNA export factor                                                                          |
| AP2A2  | AP-2 complex subunit alpha-2<br>OS=Homo sapiens (Human)<br>GN=AP2A2 PE=1 SV=2                                                              | 23 | 0 | O94973 | AP2A2_HUMAN  | AP-2 complex subunit alpha-2                                                                |
| OGT    | UDP-N-acetylglucosamine--<br>peptide N-<br>acetylglucosaminyltransferase<br>110 kDa subunit OS=Homo<br>sapiens (Human) GN=OGT<br>PE=1 SV=3 | 23 | 0 | O15294 | OGT1_HUMAN   | UDP-N-acetylglucosamine--<br>peptide N-<br>acetylglucosaminyltransferase<br>110 kDa subunit |
| UMPS   | Uridine 5'-monophosphate<br>synthase OS=Homo sapiens<br>(Human) GN=UMPS PE=1<br>SV=1                                                       | 23 | 0 | P11172 | UMPS_HUMAN   | Orotidine 5'-phosphate<br>decarboxylase                                                     |
| BRD3   | Bromodomain-containing<br>protein 3 OS=Homo sapiens<br>(Human) GN=BRD3 PE=1<br>SV=1                                                        | 23 | 0 | Q15059 | BRD3_HUMAN   | Bromodomain-containing<br>protein 3                                                         |
| TXNL1  | Thioredoxin-like protein 1<br>OS=Homo sapiens (Human)<br>GN=TXNL1 PE=1 SV=3                                                                | 22 | 0 | O43396 | TXNL1_HUMAN  | Thioredoxin-like protein 1                                                                  |
| PAF1   | RNA polymerase II-<br>associated factor 1 homolog<br>OS=Homo sapiens (Human)<br>GN=PAF1 PE=1 SV=2                                          | 22 | 0 | Q8N7H5 | PAF1_HUMAN   | RNA polymerase II-<br>associated factor 1 homolog                                           |
| ACOT13 | Acyl-coenzyme A<br>thioesterase 13 OS=Homo<br>sapiens (Human)<br>GN=ACOT13 PE=1 SV=1                                                       | 22 | 0 | Q9NPJ3 | ACO13_HUMAN  | Acyl-coenzyme A<br>thioesterase 13                                                          |
| P4HA1  | Prolyl 4-hydroxylase subunit<br>alpha-1 OS=Homo sapiens<br>(Human) GN=P4HA1 PE=1<br>SV=2                                                   | 22 | 0 | P13674 | P4HA1_HUMAN  | Prolyl 4-hydroxylase subunit<br>alpha-1                                                     |
| ANP32B | Acidic leucine-rich nuclear<br>phosphoprotein 32 family<br>member B OS=Homo<br>sapiens (Human)<br>GN=ANP32B PE=1 SV=1                      | 22 | 0 | Q92688 | AN32B_HUMAN  | Acidic leucine-rich nuclear<br>phosphoprotein 32 family<br>member B                         |
| MTDH   | Protein LYRIC OS=Homo<br>sapiens (Human) GN=MTDH<br>PE=1 SV=1                                                                              | 22 | 0 | H0YBE0 | H0YBE0_HUMAN | -                                                                                           |
| SEC24A | Protein transport protein<br>Sec24A OS=Homo sapiens<br>(Human) GN=SEC24A PE=1<br>SV=2                                                      | 21 | 0 | O95486 | SC24A_HUMAN  | Protein transport protein<br>Sec24A                                                         |
| UBA2   | SUMO-activating enzyme<br>subunit 2 OS=Homo sapiens                                                                                        | 21 | 0 | Q9UBT2 | SAE2_HUMAN   | SUMO-activating enzyme                                                                      |

|         |                                                                                                  |     |    |        |             |                                                        |
|---------|--------------------------------------------------------------------------------------------------|-----|----|--------|-------------|--------------------------------------------------------|
|         | (Human) GN=UBA2 PE=1 SV=2                                                                        |     |    |        |             | subunit 2                                              |
| XPC     | DNA repair protein complementing XP-C cells OS=Homo sapiens (Human) GN=XPC PE=1 SV=4             | 21  | 0  | Q01831 | XPC_HUMAN   | DNA repair protein complementing XP-C cells            |
| ORC3    | Origin recognition complex subunit 3 OS=Homo sapiens (Human) GN=ORC3 PE=1 SV=1                   | 21  | 0  | Q9UBD5 | ORC3_HUMAN  | Origin recognition complex subunit 3                   |
| ZFP91   | E3 ubiquitin-protein ligase ZFP91 OS=Homo sapiens (Human) GN=ZFP91 PE=1 SV=1                     | 20  | 0  | Q96JP5 | ZFP91_HUMAN | E3 ubiquitin-protein ligase ZFP91                      |
| ZNF217  | Zinc finger protein 217 OS=Homo sapiens (Human) GN=ZNF217 PE=1 SV=1                              | 20  | 0  | O75362 | ZN217_HUMAN | Zinc finger protein 217                                |
| SNRPE   | Small nuclear ribonucleoprotein E OS=Homo sapiens (Human) GN=SNRPE PE=1 SV=1                     | 20  | 0  | P62304 | RUXE_HUMAN  | Small nuclear ribonucleoprotein E                      |
| RPL31   | 60S ribosomal protein L31 OS=Homo sapiens (Human) GN=RPL31 PE=1 SV=1                             | 59  | 8  | P62899 | RL31_HUMAN  | 60S ribosomal protein L31                              |
| DHX33   | Putative ATP-dependent RNA helicase DHX33 OS=Homo sapiens (Human) GN=DHX33 PE=1 SV=2             | 33  | 10 | Q9H6R0 | DHX33_HUMAN | Putative ATP-dependent RNA helicase DHX33              |
| SNRPD3  | Small nuclear ribonucleoprotein Sm D3 OS=Homo sapiens (Human) GN=SNRPD3 PE=1 SV=1                | 46  | 10 | P62318 | SMD3_HUMAN  | Small nuclear ribonucleoprotein Sm D3                  |
| PTBP2   | Polypyrimidine tract-binding protein 2 OS=Homo sapiens (Human) GN=PTBP2 PE=1 SV=1                | 21  | 11 | Q9UKA9 | PTBP2_HUMAN | Polypyrimidine tract-binding protein 2                 |
| PIN4    | Peptidyl-prolyl cis-trans isomerase NIMA-interacting 4 OS=Homo sapiens (Human) GN=PIN4 PE=1 SV=1 | 30  | 12 | Q9Y237 | PIN4_HUMAN  | Peptidyl-prolyl cis-trans isomerase NIMA-interacting 4 |
| CTTN    | Src substrate cortactin OS=Homo sapiens (Human) GN=CTTN PE=1 SV=2                                | 111 | 12 | Q14247 | SRC8_HUMAN  | Src substrate cortactin                                |
| RPS19   | 40S ribosomal protein S19 OS=Homo sapiens (Human) GN=RPS19 PE=1 SV=2                             | 56  | 13 | P39019 | RS19_HUMAN  | 40S ribosomal protein S19                              |
| METTL16 | Methyltransferase-like protein 16 OS=Homo sapiens (Human) GN=METTL16 PE=1 SV=2                   | 28  | 14 | Q86W50 | MET16_HUMAN | Methyltransferase-like protein 16                      |
| PSMC5   | 26S protease regulatory subunit 8 OS=Homo sapiens (Human) GN=PSMC5 PE=1 SV=1                     | 42  | 14 | P62195 | PRS8_HUMAN  | 26S protease regulatory subunit 8                      |
| PSMC1   | 26S protease regulatory subunit 4 OS=Homo sapiens (Human) GN=PSMC1 PE=1 SV=1                     | 30  | 14 | P62191 | PRS4_HUMAN  | 26S protease regulatory subunit 4                      |

|         |                                                                                                            |    |    |        |             |                                                               |
|---------|------------------------------------------------------------------------------------------------------------|----|----|--------|-------------|---------------------------------------------------------------|
|         | SV=1                                                                                                       |    |    |        |             |                                                               |
| HIC2    | Hypermethylated in cancer 2 protein OS=Homo sapiens (Human) GN=HIC2 PE=1 SV=2                              | 29 | 15 | Q96JB3 | HIC2_HUMAN  | Hypermethylated in cancer 2 protein                           |
| BCCIP   | BRCA2 and CDKN1A-interacting protein OS=Homo sapiens (Human) GN=BCCIP PE=1 SV=1                            | 59 | 15 | Q9P287 | BCCIP_HUMAN | BRCA2 and CDKN1A-interacting protein                          |
| SMC6    | Structural maintenance of chromosomes protein 6 OS=Homo sapiens (Human) GN=SMC6 PE=1 SV=2                  | 21 | 15 | Q96SB8 | SMC6_HUMAN  | Structural maintenance of chromosomes protein 6               |
| CPVL    | Probable serine carboxypeptidase CPVL OS=Homo sapiens (Human) GN=CPVL PE=1 SV=2                            | 20 | 15 | Q9H3G5 | CPVL_HUMAN  | Probable serine carboxypeptidase CPVL                         |
| RPL36   | 60S ribosomal protein L36 OS=Homo sapiens (Human) GN=RPL36 PE=1 SV=3                                       | 52 | 15 | Q9Y3U8 | RL36_HUMAN  | 60S ribosomal protein L36                                     |
| PDCD5   | Programmed cell death protein 5 OS=Homo sapiens (Human) GN=PDCD5 PE=1 SV=3                                 | 55 | 16 | O14737 | PDCD5_HUMAN | Programmed cell death protein 5                               |
| ZC3H11A | Zinc finger CCCH domain-containing protein 11A OS=Homo sapiens (Human) GN=ZC3H11A PE=1 SV=3                | 24 | 16 | O75152 | ZC11A_HUMAN | Zinc finger CCCH domain-containing protein 11A                |
| EDC3    | Enhancer of mRNA-decapping protein 3 OS=Homo sapiens (Human) GN=EDC3 PE=1 SV=1                             | 42 | 16 | Q96F86 | EDC3_HUMAN  | Enhancer of mRNA-decapping protein 3                          |
| ANXA4   | Annexin A4 OS=Homo sapiens (Human) GN=ANXA4 PE=1 SV=4                                                      | 94 | 16 | P09525 | ANXA4_HUMAN | Annexin A4                                                    |
| MRE11A  | Double-strand break repair protein MRE11A OS=Homo sapiens (Human) GN=MRE11A PE=1 SV=3                      | 56 | 16 | P49959 | MRE11_HUMAN | Double-strand break repair protein MRE11A                     |
| PRKAR1A | cAMP-dependent protein kinase type I-alpha regulatory subunit OS=Homo sapiens (Human) GN=PRKAR1A PE=1 SV=1 | 24 | 16 | P10644 | KAP0_HUMAN  | cAMP-dependent protein kinase type I-alpha regulatory subunit |
| HELLS   | Lymphoid-specific helicase OS=Homo sapiens (Human) GN=HELLS PE=1 SV=1                                      | 54 | 16 | Q9NRZ9 | HELLS_HUMAN | Lymphoid-specific helicase                                    |
| PPP1R8  | Nuclear inhibitor of protein phosphatase 1 OS=Homo sapiens (Human) GN=PPP1R8 PE=1 SV=2                     | 40 | 16 | Q12972 | PP1R8_HUMAN | Activator of RNA decay                                        |
| CMSS1   | Protein CMSS1 OS=Homo sapiens (Human) GN=CMSS1 PE=1 SV=2                                                   | 22 | 17 | Q9BQ75 | CMS1_HUMAN  | Protein CMSS1                                                 |
| IQGAP2  | Ras GTPase-activating-like protein IQGAP2 OS=Homo sapiens (Human)                                          | 60 | 17 | Q13576 | IQGA2_HUMAN | Ras GTPase-activating-like protein IQGAP2                     |

|         |                                                                                                              |    |    |        |             |                                                                    |
|---------|--------------------------------------------------------------------------------------------------------------|----|----|--------|-------------|--------------------------------------------------------------------|
|         | GN=IQGAP2 PE=1 SV=4                                                                                          |    |    |        |             |                                                                    |
| WDR12   | Ribosome biogenesis protein WDR12 OS=Homo sapiens (Human) GN=WDR12 PE=1 SV=2                                 | 24 | 17 | Q9GZL7 | WDR12_HUMAN | Ribosome biogenesis protein WDR12                                  |
| GBE1    | 1,4-alpha-glucan-branching enzyme OS=Homo sapiens (Human) GN=GBE1 PE=1 SV=3                                  | 32 | 18 | Q04446 | GLGB_HUMAN  | 1,4-alpha-glucan-branching enzyme                                  |
| PARN    | Poly(A)-specific ribonuclease PARN OS=Homo sapiens (Human) GN=PARN PE=1 SV=1                                 | 81 | 18 | O95453 | PARN_HUMAN  | Poly(A)-specific ribonuclease PARN                                 |
| UBE2N   | Ubiquitin-conjugating enzyme E2 N OS=Homo sapiens (Human) GN=UBE2N PE=1 SV=1                                 | 22 | 18 | P61088 | UBE2N_HUMAN | Ubiquitin-conjugating enzyme E2 N                                  |
| IKBKAP  | Elongator complex protein 1 OS=Homo sapiens (Human) GN=IKBKAP PE=1 SV=3                                      | 37 | 18 | O95163 | ELP1_HUMAN  | Elongator complex protein 1                                        |
| HMG3    | High mobility group nucleosome-binding domain-containing protein 3 OS=Homo sapiens (Human) GN=HMG3 PE=1 SV=2 | 21 | 18 | Q15651 | HMG3_HUMAN  | High mobility group nucleosome-binding domain-containing protein 3 |
| TP53BP1 | Tumor suppressor p53-binding protein 1 OS=Homo sapiens (Human) GN=TP53BP1 PE=1 SV=2                          | 31 | 18 | Q12888 | TP53B_HUMAN | Tumor suppressor p53-binding protein 1                             |
| NCBP2   | Nuclear cap-binding protein subunit 2 OS=Homo sapiens (Human) GN=NCBP2 PE=1 SV=1                             | 36 | 19 | P52298 | NCBP2_HUMAN | Nuclear cap-binding protein subunit 2                              |
| PPP2R4  | Serine/threonine-protein phosphatase 2A activator OS=Homo sapiens (Human) GN=PPP2R4 PE=1 SV=3                | 25 | 19 | Q15257 | PTPA_HUMAN  | Serine/threonine-protein phosphatase 2A activator                  |
| CPSF2   | Cleavage and polyadenylation specificity factor subunit 2 OS=Homo sapiens (Human) GN=CPSF2 PE=1 SV=2         | 63 | 19 | Q9P210 | CPSF2_HUMAN | Cleavage and polyadenylation specificity factor subunit 2          |
| SRPK1   | SRSF protein kinase 1 OS=Homo sapiens (Human) GN=SRPK1 PE=1 SV=2                                             | 44 | 20 | Q96SB4 | SRPK1_HUMAN | SRSF protein kinase 1                                              |
| PDCD6   | Programmed cell death protein 6 OS=Homo sapiens (Human) GN=PDCD6 PE=1 SV=1                                   | 22 | 20 | O75340 | PDCD6_HUMAN | Programmed cell death protein 6                                    |
| PDIA6   | Protein disulfide-isomerase A6 OS=Homo sapiens (Human) GN=PDIA6 PE=1 SV=1                                    | 66 | 20 | Q15084 | PDIA6_HUMAN | Protein disulfide-isomerase A6                                     |
| AHSA1   | Activator of 90 kDa heat shock protein ATPase homolog 1 OS=Homo sapiens (Human) GN=AHSA1 PE=1 SV=1           | 38 | 20 | O95433 | AHSA1_HUMAN | Activator of 90 kDa heat shock protein ATPase homolog 1            |



|           |                                                                                                         |    |    |        |             |                                                         |
|-----------|---------------------------------------------------------------------------------------------------------|----|----|--------|-------------|---------------------------------------------------------|
| FKBP1A    | Peptidyl-prolyl cis-trans isomerase FKBP1A<br>OS=Homo sapiens (Human)<br>GN=FKBP1A PE=1 SV=2            | 24 | 20 | P62942 | FKB1A_HUMAN | Peptidyl-prolyl cis-trans isomerase FKBP1A              |
| PSMA5     | Proteasome subunit alpha type-5                                                                         | 27 | 21 | P28066 | PSA5_HUMAN  | Proteasome subunit alpha type-5                         |
| WDR33     | pre-mRNA 3' end processing protein WDR33 OS=Homo sapiens (Human)<br>GN=WDR33 PE=1 SV=2                  | 38 | 21 | Q9C0J8 | WDR33_HUMAN | pre-mRNA 3' end processing protein WDR33                |
| POP1      | Ribonucleases P/MRP protein subunit POP1 OS=Homo sapiens (Human)<br>GN=POP1 PE=1 SV=2                   | 21 | 21 | Q99575 | POP1_HUMAN  | Ribonucleases P/MRP protein subunit POP1                |
| GPATCH4   | G patch domain-containing protein 4 OS=Homo sapiens (Human)<br>GN=GPATCH4 PE=1 SV=2                     | 77 | 21 | Q5T3I0 | GPTC4_HUMAN | G patch domain-containing protein 4                     |
| OLA1      | Obg-like ATPase 1 OS=Homo sapiens (Human)<br>GN=OLA1 PE=1 SV=2                                          | 84 | 22 | Q9NTK5 | OLA1_HUMAN  | Obg-like ATPase 1                                       |
| APRT      | Adenine phosphoribosyltransferase OS=Homo sapiens (Human)<br>GN=APRT PE=1 SV=2                          | 21 | 22 | P07741 | APT_HUMAN   | Adenine phosphoribosyltransferase                       |
| CSNK2A2   | Casein kinase II subunit alpha' OS=Homo sapiens (Human)<br>GN=CSNK2A2 PE=1 SV=1                         | 27 | 22 | P19784 | CSK22_HUMAN | Casein kinase II subunit alpha'                         |
| C14orf166 | UPF0568 protein C14orf166 OS=Homo sapiens (Human)<br>GN=C14orf166 PE=1 SV=1                             | 80 | 22 | Q9Y224 | CN166_HUMAN | UPF0568 protein C14orf166                               |
| SPCS2     | Signal peptidase complex subunit 2 OS=Homo sapiens (Human)<br>GN=SPCS2 PE=1 SV=3                        | 26 | 22 | Q15005 | SPCS2_HUMAN | Signal peptidase complex subunit 2                      |
| KARS      | Lysine--tRNA ligase OS=Homo sapiens (Human)<br>GN=KARS PE=1 SV=3                                        | 63 | 22 | Q15046 | SYK_HUMAN   | Lysine--tRNA ligase                                     |
| WTAP      | Pre-mRNA-splicing regulator WTAP OS=Homo sapiens (Human)<br>GN=WTAP PE=1 SV=2                           | 62 | 22 | Q15007 | FL2D_HUMAN  | Pre-mRNA-splicing regulator WTAP                        |
| POLD1     | DNA polymerase delta catalytic subunit OS=Homo sapiens (Human)<br>GN=POLD1 PE=1 SV=2                    | 35 | 22 | P28340 | DPOD1_HUMAN | DNA polymerase delta catalytic subunit                  |
| SUZ12     | Polycomb protein SUZ12 OS=Homo sapiens (Human)<br>GN=SUZ12 PE=1 SV=3                                    | 39 | 23 | Q15022 | SUZ12_HUMAN | Polycomb protein SUZ12                                  |
| SEC61A1   | Protein transport protein Sec61 subunit alpha isoform 1 OS=Homo sapiens (Human)<br>GN=SEC61A1 PE=1 SV=2 | 27 | 23 | P61619 | S61A1_HUMAN | Protein transport protein Sec61 subunit alpha isoform 1 |
| BRD2      | Bromodomain-containing protein 2 OS=Homo sapiens                                                        | 37 | 23 | P25440 | BRD2_HUMAN  | Bromodomain-containing                                  |

|          |                                                                                                                       |     |    |        |             |                                                                             |
|----------|-----------------------------------------------------------------------------------------------------------------------|-----|----|--------|-------------|-----------------------------------------------------------------------------|
|          | (Human) GN=BRD2 PE=1 SV=2                                                                                             |     |    |        |             | protein 2                                                                   |
| DAD1     | Dolichyl-diphosphooligosaccharide--protein glycosyltransferase subunit DAD1 OS=Homo sapiens (Human) GN=DAD1 PE=1 SV=3 | 35  | 23 | P61803 | DAD1_HUMAN  | Dolichyl-diphosphooligosaccharide--protein glycosyltransferase subunit DAD1 |
| ADSL     | Adenylosuccinate lyase OS=Homo sapiens (Human) GN=ADSL PE=1 SV=2                                                      | 25  | 23 | P30566 | PUR8_HUMAN  | Adenylosuccinate lyase                                                      |
| NHP2     | H/ACA ribonucleoprotein complex subunit 2 OS=Homo sapiens (Human) GN=NHP2 PE=1 SV=1                                   | 65  | 24 | Q9NX24 | NHP2_HUMAN  | H/ACA ribonucleoprotein complex subunit 2                                   |
| NUP62    | Nuclear pore glycoprotein p62 OS=Homo sapiens (Human) GN=NUP62 PE=1 SV=3                                              | 27  | 24 | P37198 | NUP62_HUMAN | Nuclear pore glycoprotein p62                                               |
| RPL35A   | 60S ribosomal protein L35a OS=Homo sapiens (Human) GN=RPL35A PE=1 SV=2                                                | 34  | 24 | P18077 | RL35A_HUMAN | 60S ribosomal protein L35a                                                  |
| MPHOSPH8 | M-phase phosphoprotein 8 OS=Homo sapiens (Human) GN=MPHOSPH8 PE=1 SV=2                                                | 22  | 24 | Q99549 | MPP8_HUMAN  | M-phase phosphoprotein 8                                                    |
| COPB2    | Coatomer subunit beta' OS=Homo sapiens (Human) GN=COPB2 PE=1 SV=2                                                     | 45  | 24 | P35606 | COPB2_HUMAN | Coatomer subunit beta'                                                      |
| NAP1L1   | Nucleosome assembly protein 1-like 1 OS=Homo sapiens (Human) GN=NAP1L1 PE=1 SV=1                                      | 47  | 24 | P55209 | NP1L1_HUMAN | Nucleosome assembly protein 1-like 1                                        |
| TRMT61A  | tRNA (adenine(58)-N(1))-methyltransferase catalytic subunit TRMT61A OS=Homo sapiens (Human) GN=TRMT61A PE=1 SV=1      | 21  | 24 | Q96FX7 | TRM61_HUMAN | tRNA (adenine(58)-N(1))-methyltransferase catalytic subunit TRMT61A         |
| NELFB    | Negative elongation factor B OS=Homo sapiens (Human) GN=NELFB PE=1 SV=1                                               | 29  | 25 | Q8WX92 | NELFB_HUMAN | Negative elongation factor B                                                |
| SAR1A    | GTP-binding protein SAR1a OS=Homo sapiens (Human) GN=SAR1A PE=1 SV=1                                                  | 44  | 25 | Q9NR31 | SAR1A_HUMAN | GTP-binding protein SAR1a                                                   |
| COPB1    | Coatomer subunit beta OS=Homo sapiens (Human) GN=COPB1 PE=1 SV=3                                                      | 103 | 25 | P53618 | COPB_HUMAN  | Coatomer subunit beta                                                       |
| ZYX      | Zyxin OS=Homo sapiens (Human) GN=ZYX PE=1 SV=1                                                                        | 37  | 25 | Q15942 | ZYX_HUMAN   | Zyxin                                                                       |
| CHD1L    | Chromodomain-helicase-DNA-binding protein 1-like OS=Homo sapiens (Human) GN=CHD1L PE=1 SV=2                           | 25  | 25 | Q86WJ1 | CHD1L_HUMAN | Chromodomain-helicase-DNA-binding protein 1-like                            |
| SF3A2    | Splicing factor 3A subunit 2 OS=Homo sapiens (Human) GN=SF3A2 PE=1 SV=2                                               | 24  | 25 | Q15428 | SF3A2_HUMAN | Splicing factor 3A subunit 2                                                |

|        |                                                                                                          |     |    |        |             |                                                         |
|--------|----------------------------------------------------------------------------------------------------------|-----|----|--------|-------------|---------------------------------------------------------|
| PHF3   | PHD finger protein 3<br>OS=Homo sapiens (Human)<br>GN=PHF3 PE=1 SV=3                                     | 50  | 26 | Q92576 | PHF3_HUMAN  | PHD finger protein 3                                    |
| SP1    | Transcription factor Sp1<br>OS=Homo sapiens (Human)<br>GN=SP1 PE=1 SV=3                                  | 25  | 26 | P08047 | SP1_HUMAN   | Transcription factor Sp1                                |
| SEPT7  | Septin-7 OS=Homo sapiens<br>(Human) GN=SEPT7 PE=1<br>SV=2                                                | 80  | 26 | Q16181 | SEPT7_HUMAN | Septin-7                                                |
| EXOSC2 | Exosome complex component<br>RRP4 OS=Homo sapiens<br>(Human) GN=EXOSC2 PE=1<br>SV=2                      | 76  | 26 | Q13868 | EXOS2_HUMAN | Exosome complex component<br>RRP4                       |
| NUP43  | Nucleoporin Nup43<br>OS=Homo sapiens (Human)<br>GN=NUP43 PE=1 SV=1                                       | 29  | 26 | Q8NFH3 | NUP43_HUMAN | Nucleoporin Nup43                                       |
| API5   | Apoptosis inhibitor 5<br>OS=Homo sapiens (Human)<br>GN=API5 PE=1 SV=3                                    | 174 | 26 | Q9BZZ5 | API5_HUMAN  | Apoptosis inhibitor 5                                   |
| RBBP4  | Histone-binding protein<br>RBBP4 OS=Homo sapiens<br>(Human) GN=RBBP4 PE=1<br>SV=3                        | 95  | 27 | Q09028 | RBBP4_HUMAN | Histone-binding protein<br>RBBP4                        |
| CHAMP1 | Chromosome alignment-<br>maintaining phosphoprotein 1<br>OS=Homo sapiens (Human)<br>GN=CHAMP1 PE=1 SV=2  | 33  | 27 | Q96JM3 | CHAP1_HUMAN | Chromosome alignment-<br>maintaining phosphoprotein 1   |
| RBX1   | E3 ubiquitin-protein ligase<br>RBX1 OS=Homo sapiens<br>(Human) GN=RBX1 PE=1<br>SV=1                      | 34  | 27 | P62877 | RBX1_HUMAN  | E3 ubiquitin-protein ligase<br>RBX1                     |
| RAB11A | Ras-related protein Rab-11A<br>OS=Homo sapiens (Human)<br>GN=RAB11A PE=1 SV=3                            | 31  | 27 | P62491 | RB11A_HUMAN | Ras-related protein Rab-11A                             |
| PSME1  | Proteasome activator<br>complex subunit 1 OS=Homo<br>sapiens (Human) GN=PSME1<br>PE=1 SV=1               | 40  | 27 | Q06323 | PSME1_HUMAN | Proteasome activator<br>complex subunit 1               |
| KIF4A  | Chromosome-associated<br>kinesin KIF4A OS=Homo<br>sapiens (Human) GN=KIF4A<br>PE=1 SV=3                  | 48  | 27 | Q95239 | KIF4A_HUMAN | Chromosome-associated<br>kinesin KIF4A                  |
| NXN    | Nucleoredoxin OS=Homo<br>sapiens (Human) GN=NXN<br>PE=1 SV=2                                             | 33  | 27 | Q6DKJ4 | NXN_HUMAN   | Nucleoredoxin                                           |
| AURKB  | Aurora kinase B OS=Homo<br>sapiens (Human)<br>GN=AURKB PE=1 SV=3                                         | 39  | 28 | Q96GD4 | AURKB_HUMAN | Aurora kinase B                                         |
| EIF3E  | Eukaryotic translation<br>initiation factor 3 subunit E<br>OS=Homo sapiens (Human)<br>GN=EIF3E PE=1 SV=1 | 38  | 28 | P60228 | EIF3E_HUMAN | Eukaryotic translation<br>initiation factor 3 subunit E |
| RRP36  | Ribosomal RNA processing<br>protein 36 homolog<br>OS=Homo sapiens (Human)<br>GN=RRP36 PE=1 SV=1          | 27  | 29 | Q96EU6 | RRP36_HUMAN | Ribosomal RNA processing<br>protein 36 homolog          |

|        |                                                                                                          |    |    |        |             |                                                               |
|--------|----------------------------------------------------------------------------------------------------------|----|----|--------|-------------|---------------------------------------------------------------|
| CCDC59 | Thyroid transcription factor 1-associated protein 26<br>OS=Homo sapiens (Human)<br>GN=CCDC59 PE=1 SV=2   | 26 | 29 | Q9P031 | TAP26_HUMAN | Thyroid transcription factor 1-associated protein 26          |
| ZCCHC3 | Zinc finger CCHC domain-containing protein 3<br>OS=Homo sapiens (Human)<br>GN=ZCCHC3 PE=1 SV=1           | 25 | 29 | Q9NUD5 | ZCHC3_HUMAN | Zinc finger CCHC domain-containing protein 3                  |
| NCOR1  | Nuclear receptor corepressor 1 OS=Homo sapiens (Human) GN=NCOR1 PE=1 SV=2                                | 39 | 29 | O75376 | NCOR1_HUMAN | Nuclear receptor corepressor 1                                |
| STAT1  | Signal transducer and activator of transcription 1-alpha/beta OS=Homo sapiens (Human) GN=STAT1 PE=1 SV=2 | 85 | 29 | P42224 | STAT1_HUMAN | Signal transducer and activator of transcription 1-alpha/beta |
| NOL9   | Polynucleotide 5'-hydroxyl-kinase NOL9 OS=Homo sapiens (Human) GN=NOL9 PE=1 SV=1                         | 41 | 29 | Q5SY16 | NOL9_HUMAN  | Polynucleotide 5'-hydroxyl-kinase NOL9                        |
| NOM1   | Nucleolar MIF4G domain-containing protein 1 OS=Homo sapiens (Human) GN=NOM1 PE=1 SV=1                    | 28 | 30 | Q5C9Z4 | NOM1_HUMAN  | Nucleolar MIF4G domain-containing protein 1                   |
| VCL    | Vinculin OS=Homo sapiens (Human) GN=VCL PE=1 SV=4                                                        | 44 | 30 | P18206 | VINC_HUMAN  | Vinculin                                                      |
| EIF3F  | Eukaryotic translation initiation factor 3 subunit F OS=Homo sapiens (Human) GN=EIF3F PE=1 SV=1          | 65 | 30 | O00303 | EIF3F_HUMAN | Eukaryotic translation initiation factor 3 subunit F          |
| GTF3C4 | General transcription factor 3C polypeptide 4 OS=Homo sapiens (Human) GN=GTF3C4 PE=1 SV=2                | 27 | 30 | Q9UKN8 | TF3C4_HUMAN | General transcription factor 3C polypeptide 4                 |
| PTMA   | Prothymosin alpha OS=Homo sapiens (Human) GN=PTMA PE=1 SV=2                                              | 23 | 30 | P06454 | PTMA_HUMAN  | Prothymosin alpha                                             |
| SEC13  | Protein SEC13 homolog OS=Homo sapiens (Human) GN=SEC13 PE=1 SV=3                                         | 29 | 30 | P55735 | SEC13_HUMAN | Protein SEC13 homolog                                         |
| RFC4   | Replication factor C subunit 4 OS=Homo sapiens (Human) GN=RFC4 PE=1 SV=2                                 | 26 | 30 | P35249 | RFC4_HUMAN  | Replication factor C subunit 4                                |
| BRD1   | Bromodomain-containing protein 1 OS=Homo sapiens (Human) GN=BRD1 PE=1 SV=1                               | 23 | 30 | O95696 | BRD1_HUMAN  | Bromodomain-containing protein 1                              |
| BANF1  | Barrier-to-autointegration factor OS=Homo sapiens (Human) GN=BANF1 PE=1 SV=1                             | 54 | 31 | O75531 | BAF_HUMAN   | Barrier-to-autointegration factor                             |
| YWHAB  | 14-3-3 protein beta/alpha OS=Homo sapiens (Human) GN=YWHAB PE=1 SV=3                                     | 95 | 31 | P31946 | 1433B_HUMAN | 14-3-3 protein beta/alpha                                     |

|         |                                                                                                                 |     |    |        |             |                                                              |
|---------|-----------------------------------------------------------------------------------------------------------------|-----|----|--------|-------------|--------------------------------------------------------------|
| ARL6IP4 | ADP-ribosylation factor-like protein 6-interacting protein 4<br>OS=Homo sapiens (Human)<br>GN=ARL6IP4 PE=1 SV=2 | 72  | 31 | Q66PJ3 | AR6P4_HUMAN | ADP-ribosylation factor-like protein 6-interacting protein 4 |
| CSTF2   | Cleavage stimulation factor subunit 2<br>OS=Homo sapiens (Human)<br>GN=CSTF2 PE=1 SV=1                          | 125 | 31 | P33240 | CSTF2_HUMAN | Cleavage stimulation factor subunit 2                        |
| CMAS    | N-acetylneuraminate cytidyltransferase<br>OS=Homo sapiens (Human)<br>GN=CMAS PE=1 SV=2                          | 29  | 31 | Q8NFW8 | NEUA_HUMAN  | N-acetylneuraminate cytidyltransferase                       |
| USP11   | Ubiquitin carboxyl-terminal hydrolase 11<br>OS=Homo sapiens (Human)<br>GN=USP11 PE=1 SV=3                       | 28  | 31 | P51784 | UBP11_HUMAN | Ubiquitin carboxyl-terminal hydrolase 11                     |
| MIF     | Macrophage migration inhibitory factor<br>OS=Homo sapiens (Human)<br>GN=MIF PE=1 SV=4                           | 53  | 31 | P14174 | MIF_HUMAN   | Macrophage migration inhibitory factor                       |
| KPNA3   | Importin subunit alpha-4<br>OS=Homo sapiens (Human)<br>GN=KPNA3 PE=1 SV=2                                       | 51  | 32 | O00505 | IMA4_HUMAN  | Importin subunit alpha-4                                     |
| SMC2    | Structural maintenance of chromosomes protein 2<br>OS=Homo sapiens (Human)<br>GN=SMC2 PE=1 SV=2                 | 28  | 32 | O95347 | SMC2_HUMAN  | Structural maintenance of chromosomes protein 2              |
| ANXA5   | Annexin A5<br>OS=Homo sapiens (Human)<br>GN=ANXA5 PE=1 SV=2                                                     | 77  | 32 | P08758 | ANXA5_HUMAN | Annexin A5                                                   |

**Table S2, related to Figure 4B: REV-ERB $\alpha$  knockdown disturbs HepG2 cellular protein O-GlcNAcylation.** List of identified O-GlcNAcylated protein identified by LC-MS/MS analysis after SDS-PAGE separation of enriched O-GlcNAcylated protein immunoprecipitated from HepG2 cells transfected by the indicated siRNA (Scr or targeting REV-ERB $\alpha$ ).

| siScr vs si NR1D1 HepG2 |                                                                                                                   | Score Sequest HT |          |
|-------------------------|-------------------------------------------------------------------------------------------------------------------|------------------|----------|
| Accession               | Description                                                                                                       | si Ctrl          | si NR1D1 |
| A8K7Q2                  | Heat shock cognate 71 kDa protein OS=Homo sapiens GN=HSPA8 PE=1 SV=1                                              | 5006,37          | 1697,81  |
| P38646                  | Stress-70 protein, mitochondrial OS=Homo sapiens GN=HSPA9 PE=1 SV=2                                               | 4735,69          | 1953,91  |
| A0A075B7D9              | TATA-binding protein-associated factor 2N OS=Homo sapiens GN=TAF15 PE=1 SV=1                                      | 781,07           | 61,26    |
| P55884                  | Eukaryotic translation initiation factor 3 subunit B OS=Homo sapiens GN=EIF3B PE=1 SV=3                           | 426,97           | 0        |
| Q7Z3B4                  | Nucleoporin p54 OS=Homo sapiens GN=NUP54 PE=1 SV=2                                                                | 1117,41          | 709,71   |
| B4E227                  | Nuclear RNA export factor 1 OS=Homo sapiens GN=NXF1 PE=1 SV=1                                                     | 602,67           | 229,74   |
| V9HW22                  | Epididymis luminal protein 33 OS=Homo sapiens GN=HEL-S-72p PE=2 SV=1                                              | 493,49           | 129,89   |
| O94855                  | Protein transport protein Sec24D OS=Homo sapiens GN=SEC24D PE=1 SV=2                                              | 564,3            | 205,07   |
| Q53GZ6                  | Heat shock 70kDa protein 8 isoform 1 variant (Fragment) OS=Homo sapiens PE=2 SV=1                                 | 751,75           | 410,07   |
| P61978                  | Heterogeneous nuclear ribonucleoprotein K OS=Homo sapiens GN=HNRNPK PE=1 SV=1                                     | 313,3            | 0        |
| A6NEM2                  | Host cell factor 1 OS=Homo sapiens GN=HCFC1 PE=1 SV=2                                                             | 2561,58          | 2257,76  |
| Q59EJ3                  | Heat shock 70kDa protein 1A variant (Fragment) OS=Homo sapiens PE=2 SV=1                                          | 297,51           | 0        |
| Q6IBQ5                  | FUS protein OS=Homo sapiens GN=FUS PE=2 SV=1                                                                      | 289,27           | 0        |
| B3GQS7                  | Mitochondrial heat shock 60kD protein 1 variant 1 OS=Homo sapiens GN=HSPD1 PE=2 SV=1                              | 419,17           | 130,7    |
| Q53HF2                  | Heat shock 70kDa protein 8 isoform 2 variant (Fragment) OS=Homo sapiens PE=1 SV=1                                 | 630,16           | 358,1    |
| O15294                  | UDP-N-acetylglucosamine--peptide N-acetylglucosaminyltransferase 110 kDa subunit OS=Homo sapiens GN=OGT PE=1 SV=3 | 361,79           | 105,11   |
| A0A0D9SF53              | ATP-dependent RNA helicase DDX3X OS=Homo sapiens GN=DDX3X PE=1 SV=1                                               | 748,17           | 492,07   |
| P17066                  | Heat shock 70 kDa protein 6 OS=Homo sapiens GN=HSPA6 PE=1 SV=2                                                    | 349,14           | 100,56   |
| A0A0D9SEI3              | Cyclin-dependent kinase 11B OS=Homo sapiens GN=CDK11B PE=1 SV=1                                                   | 345,38           | 98,5     |
| P53992                  | Protein transport protein Sec24C OS=Homo sapiens GN=SEC24C PE=1 SV=3                                              | 496,9            | 257,06   |
| B4DRT3                  | Pyruvate kinase OS=Homo sapiens PE=2 SV=1                                                                         | 1126,28          | 918,28   |
| Q86X55                  | Histone-arginine methyltransferase CARM1 OS=Homo sapiens GN=CARM1 PE=1 SV=3                                       | 712,68           | 516,06   |
| H3BQK0                  | ATP-dependent RNA helicase DDX19B OS=Homo sapiens GN=DDX19B PE=1 SV=1                                             | 188,8            | 0        |
| A8K3C3                  | T-complex protein 1 subunit delta OS=Homo sapiens PE=2 SV=1                                                       | 305,47           | 117,48   |
| P34931                  | Heat shock 70 kDa protein 1-like OS=Homo sapiens GN=HSPA1L PE=1 SV=2                                              | 408,34           | 221      |
| P15924                  | Desmoplakin OS=Homo sapiens GN=DSP PE=1 SV=3                                                                      | 645,88           | 459,82   |
| I3L352                  | ATP-dependent RNA helicase DDX19A (Fragment) OS=Homo sapiens GN=DDX19A PE=1 SV=1                                  | 181,72           | 0        |
| B0QY89                  | Eukaryotic translation initiation factor 3 subunit L OS=Homo sapiens GN=EIF3L PE=1 SV=1                           | 350,4            | 178,21   |
| D6RIH9                  | Heterogeneous nuclear ribonucleoprotein H OS=Homo sapiens GN=HNRNPH1 PE=1 SV=1                                    | 255,66           | 86,37    |
| D6REX3                  | Protein transport protein Sec31A OS=Homo sapiens GN=SEC31A PE=1 SV=1                                              | 362,77           | 203,55   |
| P54652                  | Heat shock-related 70 kDa protein 2 OS=Homo sapiens GN=HSPA2 PE=1 SV=1                                            | 321,56           | 163,08   |
| P13639                  | Elongation factor 2 OS=Homo sapiens GN=EEF2 PE=1 SV=4                                                             | 276,47           | 122,41   |
| Q59ET3                  | Chaperonin containing TCP1, subunit 6A isoform a variant (Fragment) OS=Homo sapiens PE=2 SV=1                     | 225,95           | 76,98    |

|            |                                                                                                                                                              |        |        |
|------------|--------------------------------------------------------------------------------------------------------------------------------------------------------------|--------|--------|
| V9HWA9     | Epididymis secretory sperm binding protein Li 62p OS=Homo sapiens GN=HEL-S-62p PE=2 SV=1                                                                     | 147,38 | 0      |
| Q96RK0     | Protein capicua homolog OS=Homo sapiens GN=CIC PE=1 SV=2                                                                                                     | 239,5  | 92,9   |
| H7BXF5     | Histone deacetylase complex subunit SAP130 OS=Homo sapiens GN=SAP130 PE=1 SV=1                                                                               | 143,4  | 0      |
| Q6IRW3     | Semenogelin II OS=Homo sapiens GN=SEMG2 PE=2 SV=1                                                                                                            | 143,02 | 0      |
| G3V220     | Transcription elongation regulator 1 OS=Homo sapiens GN=TCERG1 PE=1 SV=1                                                                                     | 283,12 | 140,53 |
| P49368     | T-complex protein 1 subunit gamma OS=Homo sapiens GN=CCT3 PE=1 SV=4                                                                                          | 322,43 | 181,15 |
| A0A087WUL0 | Protein TKFC OS=Homo sapiens GN=TKFC PE=1 SV=1                                                                                                               | 135,9  | 0      |
| Q9UPQ9     | Trinucleotide repeat-containing gene 6B protein OS=Homo sapiens GN=TNRC6B PE=1 SV=4                                                                          | 255,8  | 124,02 |
| P0DMV9     | Heat shock 70 kDa protein 1B OS=Homo sapiens GN=HSPA1B PE=1 SV=1                                                                                             | 340,78 | 209,56 |
| Q13492     | Phosphatidylinositol-binding clathrin assembly protein OS=Homo sapiens GN=PICALM PE=1 SV=2                                                                   | 235,29 | 104,32 |
| Q9BVL2     | Nucleoporin p58/p45 OS=Homo sapiens GN=NUPL1 PE=1 SV=1                                                                                                       | 443,79 | 316,17 |
| O15027     | Protein transport protein Sec16A OS=Homo sapiens GN=SEC16A PE=1 SV=3                                                                                         | 124,96 | 0      |
| Q96KR1     | Zinc finger RNA-binding protein OS=Homo sapiens GN=ZFR PE=1 SV=2                                                                                             | 151,44 | 26,82  |
| Q8TBR3     | Fusion (Involved in t(1216) in malignant liposarcoma) OS=Homo sapiens GN=FUS PE=2 SV=1                                                                       | 578,54 | 454,29 |
| A0A024R1A3 | Ubiquitin-activating enzyme E1 (A1S9T and BN75 temperature sensitivity complementing), isoform CRA_a OS=Homo sapiens GN=UBE1 PE=3 SV=1                       | 122,89 | 0      |
| Q13835     | Plakophilin-1 OS=Homo sapiens GN=PKP1 PE=1 SV=2                                                                                                              | 121,46 | 0      |
| B7ZVY7     | Cell division cycle 2-like 1 (PITSLRE proteins) OS=Homo sapiens GN=CDC2L1 PE=1 SV=1                                                                          | 180,12 | 62,34  |
| A0A024RDH6 | SEC31-like 1 (S. cerevisiae), isoform CRA_b OS=Homo sapiens GN=SEC31L1 PE=4 SV=1                                                                             | 250,56 | 134,7  |
| A0A0C4DH82 | SEC23-interacting protein OS=Homo sapiens GN=SEC23IP PE=1 SV=1                                                                                               | 416,68 | 303,67 |
| Q59EA0     | Ubiquitin associated protein 2 isoform 3 variant (Fragment) OS=Homo sapiens PE=2 SV=1                                                                        | 122,52 | 10,26  |
| B3KT93     | Polyadenylate-binding protein OS=Homo sapiens PE=2 SV=1                                                                                                      | 287,56 | 176,12 |
| E9PK59     | N-terminal kinase-like protein OS=Homo sapiens GN=SCYL1 PE=1 SV=1                                                                                            | 105,37 | 0      |
| B3KQT2     | Protein disulfide-isomerase OS=Homo sapiens PE=2 SV=1                                                                                                        | 251,02 | 148,93 |
| Q5CAQ4     | TNF receptor-associated protein 1 OS=Homo sapiens GN=TRAP1 PE=2 SV=1                                                                                         | 240,9  | 139,41 |
| Q9HBB2     | Aconitate hydratase OS=Homo sapiens GN=IRP1 PE=2 SV=1                                                                                                        | 124,36 | 23,35  |
| E7EQR6     | T-complex protein 1 subunit alpha OS=Homo sapiens GN=TCP1 PE=1 SV=1                                                                                          | 267,55 | 166,7  |
| Q3LXA3     | Bifunctional ATP-dependent dihydroxyacetone kinase/FAD-AMP lyase (cyclizing) OS=Homo sapiens GN=DAK PE=1 SV=2                                                | 140,64 | 41,97  |
| B7ZAR1     | T-complex protein 1 subunit epsilon OS=Homo sapiens GN=CCT5 PE=1 SV=1                                                                                        | 96,98  | 0      |
| Q3B7A7     | Phosphoribosylglycinamide formyltransferase, phosphoribosylglycinamide synthetase, phosphoribosylaminoimidazole synthetase OS=Homo sapiens GN=GART PE=2 SV=1 | 96,87  | 0      |
| Q70T18     | BBF2H7/FUS protein (Fragment) OS=Homo sapiens PE=2 SV=1                                                                                                      | 219,13 | 124,92 |
| P54578     | Ubiquitin carboxyl-terminal hydrolase 14 OS=Homo sapiens GN=USP14 PE=1 SV=3                                                                                  | 93,66  | 0      |
| Q92900     | Regulator of nonsense transcripts 1 OS=Homo sapiens GN=UPF1 PE=1 SV=2                                                                                        | 134,02 | 40,75  |
| A0A087WZS2 | Microsomal triglyceride transfer protein large subunit OS=Homo sapiens GN=MTTP PE=1 SV=1                                                                     | 188,83 | 99,28  |
| B4DE36     | Glucose-6-phosphate isomerase OS=Homo sapiens PE=2 SV=1                                                                                                      | 88,98  | 0      |
| A0A024R9A4 | DEAD (Asp-Glu-Ala-Asp) box polypeptide 3, Y-linked, isoform CRA_a OS=Homo sapiens GN=DDX3Y PE=3 SV=1                                                         | 257,27 | 168,44 |



|            |                                                                                                                       |        |        |
|------------|-----------------------------------------------------------------------------------------------------------------------|--------|--------|
| Q16822     | Phosphoenolpyruvate carboxykinase [GTP], mitochondrial OS=Homo sapiens GN=PCK2 PE=1 SV=3                              | 146,56 | 63,28  |
| Q5QPR3     | Cyclin-dependent kinase 11A OS=Homo sapiens GN=CDK11A PE=1 SV=1                                                       | 123    | 40,82  |
| Q86TG7     | Retrotransposon-derived protein PEG10 OS=Homo sapiens GN=PEG10 PE=1 SV=2                                              | 133,16 | 51,44  |
| H3BPE7     | RNA-binding protein FUS OS=Homo sapiens GN=FUS PE=1 SV=1                                                              | 289,27 | 211,47 |
| Q13344     | Fus-like protein (Fragment) OS=Homo sapiens PE=2 SV=1                                                                 | 289,27 | 211,47 |
| Q15233     | Non-POU domain-containing octamer-binding protein OS=Homo sapiens GN=NONO PE=1 SV=4                                   | 99,9   | 22,17  |
| A0A087X078 | DNA mismatch repair protein Msh2 OS=Homo sapiens GN=MSH2 PE=1 SV=1                                                    | 136,75 | 59,95  |
| Q53GR7     | Solute carrier family 25, member 13 (Citrin) variant (Fragment) OS=Homo sapiens PE=2 SV=1                             | 163,1  | 87,86  |
| H0YM23     | Ankyrin repeat domain-containing protein 17 (Fragment) OS=Homo sapiens GN=ANKRD17 PE=1 SV=1                           | 74,48  | 0      |
| Q5JYR4     | Dolichyl-diphosphooligosaccharide--protein glycosyltransferase subunit 2 (Fragment) OS=Homo sapiens GN=RPN2 PE=1 SV=5 | 73,36  | 0      |
| Q9BTC0     | Death-inducer obliterator 1 OS=Homo sapiens GN=DIDO1 PE=1 SV=5                                                        | 98,37  | 29,85  |
| P50990     | T-complex protein 1 subunit theta OS=Homo sapiens GN=CCT8 PE=1 SV=4                                                   | 189,42 | 121,14 |
| Q06AH7     | Transferrin OS=Homo sapiens GN=TF PE=2 SV=1                                                                           | 68,2   | 0      |
| E9PDF6     | Unconventional myosin-Ib OS=Homo sapiens GN=MYO1B PE=1 SV=1                                                           | 66,9   | 0      |
| I3L0K7     | Heat shock protein 75 kDa, mitochondrial OS=Homo sapiens GN=TRAP1 PE=1 SV=1                                           | 156,42 | 90,33  |
| F5H2F4     | C-1-tetrahydrofolate synthase, cytoplasmic OS=Homo sapiens GN=MTHFD1 PE=1 SV=1                                        | 201,78 | 136,26 |
| H0Y6K5     | Transcription factor Sp3 OS=Homo sapiens GN=SP3 PE=1 SV=1                                                             | 170,5  | 106,56 |
| Q05BK6     | Protein TFG OS=Homo sapiens GN=TFG PE=1 SV=1                                                                          | 251,14 | 189,67 |
| J3KQ69     | DNA replication licensing factor MCM3 OS=Homo sapiens GN=MCM3 PE=1 SV=2                                               | 59,67  | 0      |
| B0YIW6     | Archain 1, isoform CRA_a OS=Homo sapiens GN=ARCN1 PE=1 SV=1                                                           | 56,57  | 0      |
| F5H6E2     | Unconventional myosin-Ic OS=Homo sapiens GN=MYO1C PE=1 SV=1                                                           | 56,3   | 0      |
| Q9Y6M1     | Insulin-like growth factor 2 mRNA-binding protein 2 OS=Homo sapiens GN=IGF2BP2 PE=1 SV=2                              | 55,08  | 0      |
| P14866     | Heterogeneous nuclear ribonucleoprotein L OS=Homo sapiens GN=HNRNPL PE=1 SV=2                                         | 124,46 | 70,64  |
| E9PK47     | Alpha-1,4 glucan phosphorylase OS=Homo sapiens GN=PYGL PE=1 SV=1                                                      | 207    | 153,49 |
| A0A087WTE1 | Inter-alpha-trypsin inhibitor heavy chain H2 OS=Homo sapiens GN=ITIH2 PE=1 SV=1                                       | 53,3   | 0      |
| Q14119     | Vascular endothelial zinc finger 1 OS=Homo sapiens GN=VEZF1 PE=1 SV=2                                                 | 51,83  | 0      |
| O60701     | UDP-glucose 6-dehydrogenase OS=Homo sapiens GN=UGDH PE=1 SV=1                                                         | 85,27  | 34,29  |
| A0A0A0MS59 | Helicase SRCAP OS=Homo sapiens GN=SRCAP PE=1 SV=1                                                                     | 206,09 | 156,47 |
| P28288     | ATP-binding cassette sub-family D member 3 OS=Homo sapiens GN=ABCD3 PE=1 SV=1                                         | 48,63  | 0      |
| H7BZ94     | Protein disulfide-isomerase OS=Homo sapiens GN=P4HB PE=1 SV=2                                                         | 47,97  | 0      |
| P41250     | Glycine--tRNA ligase OS=Homo sapiens GN=GARS PE=1 SV=3                                                                | 84,83  | 37,86  |
| Q08211     | ATP-dependent RNA helicase A OS=Homo sapiens GN=DHX9 PE=1 SV=4                                                        | 103,81 | 57,06  |
| Q13200     | 26S proteasome non-ATPase regulatory subunit 2 OS=Homo sapiens GN=PSMD2 PE=1 SV=3                                     | 66,51  | 21,22  |
| H0Y2W2     | ATPase family AAA domain-containing protein 3A (Fragment) OS=Homo sapiens GN=ATAD3A PE=1 SV=1                         | 44,6   | 0      |
| Q5SYQ9     | Retinal dehydrogenase 1 OS=Homo sapiens GN=ALDH1A1 PE=1 SV=1                                                          | 64,57  | 20,06  |
| P68032     | Actin, alpha cardiac muscle 1 OS=Homo sapiens GN=ACTC1 PE=1 SV=1                                                      | 42,96  | 0      |

|            |                                                                                                                                                                              |        |        |
|------------|------------------------------------------------------------------------------------------------------------------------------------------------------------------------------|--------|--------|
| Q8IW76     | EIF2AK2 protein (Fragment) OS=Homo sapiens GN=EIF2AK2 PE=2 SV=1                                                                                                              | 42,87  | 0      |
| F8VQP2     | Ataxin-2 OS=Homo sapiens GN=ATXN2 PE=1 SV=1                                                                                                                                  | 42     | 0      |
| B5ME19     | Eukaryotic translation initiation factor 3 subunit C-like protein OS=Homo sapiens GN=EIF3CL PE=3 SV=1                                                                        | 41,75  | 0      |
| Q6IAP9     | PRPF4 protein OS=Homo sapiens GN=PRPF4 PE=2 SV=1                                                                                                                             | 41,1   | 0      |
| A0A024R1V5 | Myeloid/lymphoid or mixed-lineage leukemia (Trithorax homolog, Drosophila) translocated to, 6, isoform CRA_a OS=Homo sapiens GN=MLLT6 PE=4 SV=1                              | 40,82  | 0      |
| Q8WUM4     | Programmed cell death 6-interacting protein OS=Homo sapiens GN=PDCD6IP PE=1 SV=1                                                                                             | 175,62 | 135,32 |
| O95782     | AP-2 complex subunit alpha-1 OS=Homo sapiens GN=AP2A1 PE=1 SV=3                                                                                                              | 39,88  | 0      |
| A7XAK3     | Capicua-like protein/double homeodomain 4 fusion protein OS=Homo sapiens GN=CIC/DUX4 fusion PE=2 SV=1                                                                        | 64,46  | 26,15  |
| Q8NHX6     | DNA helicase OS=Homo sapiens GN=HCC5 PE=2 SV=1                                                                                                                               | 37,12  | 0      |
| P16615     | Sarcoplasmic/endoplasmic reticulum calcium ATPase 2 OS=Homo sapiens GN=ATP2A2 PE=1 SV=1                                                                                      | 36,98  | 0      |
| A0A087WY75 | Nuclear envelope pore membrane protein POM 121C OS=Homo sapiens GN=POM121C PE=1 SV=1                                                                                         | 472,89 | 435,94 |
| B2RA56     | Nicalin OS=Homo sapiens PE=2 SV=1                                                                                                                                            | 35,58  | 0      |
| P05023     | Sodium/potassium-transporting ATPase subunit alpha-1 OS=Homo sapiens GN=ATP1A1 PE=1 SV=1                                                                                     | 47,94  | 12,72  |
| F8W108     | AT-rich interactive domain-containing protein 2 OS=Homo sapiens GN=ARID2 PE=1 SV=1                                                                                           | 34,78  | 0      |
| A8MUD9     | 60S ribosomal protein L7 OS=Homo sapiens GN=RPL7 PE=1 SV=1                                                                                                                   | 55,92  | 21,29  |
| H3BUF6     | Ataxin-2-like protein OS=Homo sapiens GN=ATXN2L PE=1 SV=1                                                                                                                    | 34,33  | 0      |
| P09327     | Villin-1 OS=Homo sapiens GN=VIL1 PE=1 SV=4                                                                                                                                   | 92,07  | 58,56  |
| C9JC84     | Fibrinogen gamma chain OS=Homo sapiens GN=FGG PE=1 SV=1                                                                                                                      | 33,36  | 0      |
| O95399     | Urotensin-2 OS=Homo sapiens GN=UTS2 PE=1 SV=1                                                                                                                                | 32,94  | 0      |
| P13674     | Prolyl 4-hydroxylase subunit alpha-1 OS=Homo sapiens GN=P4HA1 PE=1 SV=2                                                                                                      | 30,88  | 0      |
| O00425     | Insulin-like growth factor 2 mRNA-binding protein 3 OS=Homo sapiens GN=IGF2BP3 PE=1 SV=2                                                                                     | 30,79  | 0      |
| Q16555     | Dihydropyrimidinase-related protein 2 OS=Homo sapiens GN=DPYSL2 PE=1 SV=1                                                                                                    | 30,6   | 0      |
| V9HW37     | Epididymis secretory protein Li 69 OS=Homo sapiens GN=HEL-S-69 PE=1 SV=1                                                                                                     | 30,57  | 0      |
| P09960     | Leukotriene A-4 hydrolase OS=Homo sapiens GN=LTA4H PE=1 SV=2                                                                                                                 | 29,67  | 0      |
| K7ER00     | Phenylalanine--tRNA ligase alpha subunit OS=Homo sapiens GN=FARSA PE=1 SV=1                                                                                                  | 28,88  | 0      |
| A8K8D9     | Glucose-6-phosphate 1-dehydrogenase OS=Homo sapiens PE=2 SV=1                                                                                                                | 391,32 | 362,48 |
| P02786     | Transferrin receptor protein 1 OS=Homo sapiens GN=TFRC PE=1 SV=2                                                                                                             | 28,8   | 0      |
| A4D111     | Similar to Chain , Heat-Shock Cognate 70kd Protein (44kd Atpase N-Terminal) (E.C.3.6.1.3) Mutant With Asp 206 Replaced By Ser (D206s) OS=Homo sapiens GN=LOC401308 PE=3 SV=1 | 62,82  | 34,44  |
| Q08380     | Galectin-3-binding protein OS=Homo sapiens GN=LGALS3BP PE=1 SV=1                                                                                                             | 120,67 | 92,3   |
| A0A024R7U6 | MCM4 minichromosome maintenance deficient 4 (S. cerevisiae), isoform CRA_a OS=Homo sapiens GN=MCM4 PE=3 SV=1                                                                 | 27,24  | 0      |
| Q9HCC0     | Methylcrotonoyl-CoA carboxylase beta chain, mitochondrial OS=Homo sapiens GN=MCCC2 PE=1 SV=1                                                                                 | 26,15  | 0      |
| Q53XL8     | Proteasome (Prosome, macropain) 26S subunit, ATPase, 1 OS=Homo sapiens GN=PSMC1 PE=1 SV=1                                                                                    | 26,1   | 0      |
| Q9Y678     | Coatomer subunit gamma-1 OS=Homo sapiens GN=COPG1 PE=1 SV=1                                                                                                                  | 56,56  | 31,12  |
| Q53H53     | Flavin containing monooxygenase 5 variant (Fragment) OS=Homo sapiens PE=2 SV=1                                                                                               | 25,3   | 0      |

|            |                                                                                                                                                  |        |       |
|------------|--------------------------------------------------------------------------------------------------------------------------------------------------|--------|-------|
| P13637     | Sodium/potassium-transporting ATPase subunit alpha-3 OS=Homo sapiens GN=ATP1A3 PE=1 SV=3                                                         | 24,98  | 0     |
| Q99832     | T-complex protein 1 subunit eta OS=Homo sapiens GN=CCT7 PE=1 SV=2                                                                                | 124,57 | 99,81 |
| MOQXN5     | Nuclear pore glycoprotein p62 OS=Homo sapiens GN=NUP62 PE=1 SV=1                                                                                 | 100,31 | 76,41 |
| E9PP73     | Coatomer subunit beta (Fragment) OS=Homo sapiens GN=COPB1 PE=1 SV=5                                                                              | 68,2   | 44,76 |
| P53621     | Coatomer subunit alpha OS=Homo sapiens GN=COPA PE=1 SV=2                                                                                         | 22     | 0     |
| P14136     | Glial fibrillary acidic protein OS=Homo sapiens GN=GFAP PE=1 SV=1                                                                                | 21,84  | 0     |
| Q9BV61     | TRAP1 protein (Fragment) OS=Homo sapiens GN=TRAP1 PE=2 SV=2                                                                                      | 62,68  | 41,18 |
| Q5JR04     | Mov10, Moloney leukemia virus 10, homolog (Mouse), isoform CRA_a OS=Homo sapiens GN=MOV10 PE=1 SV=1                                              | 21,23  | 0     |
| Q9P2N6     | KAT8 regulatory NSL complex subunit 3 OS=Homo sapiens GN=KANSL3 PE=1 SV=2                                                                        | 77,43  | 56,42 |
| A8K984     | Structural maintenance of chromosomes protein OS=Homo sapiens PE=2 SV=1                                                                          | 21     | 0     |
| Q13177     | Serine/threonine-protein kinase PAK 2 OS=Homo sapiens GN=PAK2 PE=1 SV=3                                                                          | 18,51  | 0     |
| P31749     | RAC-alpha serine/threonine-protein kinase OS=Homo sapiens GN=AKT1 PE=1 SV=2                                                                      | 18,13  | 0     |
| O75533     | Splicing factor 3B subunit 1 OS=Homo sapiens GN=SF3B1 PE=1 SV=3                                                                                  | 18     | 0     |
| Q9UQC1     | Heat shock protein 72 (Fragment) OS=Homo sapiens GN=HSP70-1 PE=3 SV=1                                                                            | 55,31  | 37,96 |
| O15047     | Histone-lysine N-methyltransferase SETD1A OS=Homo sapiens GN=SETD1A PE=1 SV=3                                                                    | 17     | 0     |
| Q13884     | Beta-1-syntrophin OS=Homo sapiens GN=SNTB1 PE=1 SV=3                                                                                             | 16,95  | 0     |
| Q86XN7     | Proline and serine-rich protein 1 OS=Homo sapiens GN=PROSER1 PE=1 SV=2                                                                           | 16,32  | 0     |
| P54136     | Arginine--tRNA ligase, cytoplasmic OS=Homo sapiens GN=RARS PE=1 SV=2                                                                             | 27,83  | 11,63 |
| O95163     | Elongator complex protein 1 OS=Homo sapiens GN=IKBKAP PE=1 SV=3                                                                                  | 15     | 0     |
| Q76L82     | Additional sex combs like 1 (Drosophila), isoform CRA_d OS=Homo sapiens GN=ASXH1 PE=1 SV=1                                                       | 14,78  | 0     |
| Q9ULC5     | Long-chain-fatty-acid--CoA ligase 5 OS=Homo sapiens GN=ACSL5 PE=1 SV=1                                                                           | 14,71  | 0     |
| C9J9G2     | PHD finger protein 12 OS=Homo sapiens GN=PHF12 PE=1 SV=2                                                                                         | 100,64 | 86,28 |
| Q96T67     | TOB3 OS=Homo sapiens PE=2 SV=1                                                                                                                   | 14,36  | 0     |
| E9PF10     | Nuclear pore complex protein Nup155 OS=Homo sapiens GN=NUP155 PE=1 SV=1                                                                          | 14     | 0     |
| Q6P4R8     | Nuclear factor related to kappa-B-binding protein OS=Homo sapiens GN=NFRKB PE=1 SV=2                                                             | 14     | 0     |
| O94925     | Glutaminase kidney isoform, mitochondrial OS=Homo sapiens GN=GLS PE=1 SV=1                                                                       | 13,78  | 0     |
| A0A087WT27 | Phosphoacetylglucosamine mutase OS=Homo sapiens GN=PGM3 PE=1 SV=1                                                                                | 13,74  | 0     |
| Q7KZF4     | Staphylococcal nuclease domain-containing protein 1 OS=Homo sapiens GN=SND1 PE=1 SV=1                                                            | 84,2   | 70,76 |
| P55060     | Exportin-2 OS=Homo sapiens GN=CSE1L PE=1 SV=3                                                                                                    | 12,93  | 0     |
| P49756     | RNA-binding protein 25 OS=Homo sapiens GN=RBM25 PE=1 SV=3                                                                                        | 56,58  | 43,84 |
| O95036     | Similar to 60S ribosomal protein L7; similar to P18124 (PID:d133021) OS=Homo sapiens GN=WUGSC:H_RG054D04.1 PE=3 SV=1                             | 12,62  | 0     |
| P50570     | Dynammin-2 OS=Homo sapiens GN=DNM2 PE=1 SV=2                                                                                                     | 12,54  | 0     |
| P49792     | E3 SUMO-protein ligase RanBP2 OS=Homo sapiens GN=RANBP2 PE=1 SV=2                                                                                | 12,52  | 0     |
| A0A024R1N4 | X-ray repair complementing defective repair in Chinese hamster cells 6 (Ku autoantigen, 70kDa), isoform CRA_a OS=Homo sapiens GN=XRCC6 PE=4 SV=1 | 12,35  | 0     |
| P06737     | Glycogen phosphorylase, liver form OS=Homo sapiens GN=PYGL PE=1 SV=4                                                                             | 42,89  | 30,67 |
| Q9UL79     | Myosin-reactive immunoglobulin light chain variable region (Fragment) OS=Homo sapiens PE=2 SV=1                                                  | 11,9   | 0     |

|            |                                                                                             |        |        |
|------------|---------------------------------------------------------------------------------------------|--------|--------|
| P54577     | Tyrosine--tRNA ligase, cytoplasmic OS=Homo sapiens GN=YARS PE=1 SV=4                        | 11,67  | 0      |
| P55795     | Heterogeneous nuclear ribonucleoprotein H2 OS=Homo sapiens GN=HNRNPH2 PE=1 SV=1             | 11,37  | 0      |
| Q14683     | Structural maintenance of chromosomes protein 1A OS=Homo sapiens GN=SMC1A PE=1 SV=2         | 11     | 0      |
| Q8WY24     | SNC66 protein OS=Homo sapiens PE=1 SV=1                                                     | 10,86  | 0      |
| O15371     | Eukaryotic translation initiation factor 3 subunit D OS=Homo sapiens GN=EIF3D PE=1 SV=1     | 10,64  | 0      |
| Q5JRR6     | Ubiquitin-like modifier-activating enzyme 1 OS=Homo sapiens GN=UBA1 PE=1 SV=1               | 10,51  | 0      |
| E9KL44     | Epididymis tissue sperm binding protein Li 14m OS=Homo sapiens PE=2 SV=1                    | 10,35  | 0      |
| Q2KHR3     | Glutamine and serine-rich protein 1 OS=Homo sapiens GN=QSER1 PE=1 SV=3                      | 10,33  | 0      |
| O60506     | Heterogeneous nuclear ribonucleoprotein Q OS=Homo sapiens GN=SYNCRIP                        | 30,96  | 20,64  |
| Q14554     | Protein disulfide-isomerase A5 OS=Homo sapiens GN=PDIA5 PE=1 SV=1                           | 10,25  | 0      |
| Q9UKI9     | POU domain, class 2, transcription factor 3 OS=Homo sapiens GN=POU2F3 PE=2 SV=3             | 10,22  | 0      |
| A0A0C4DGH5 | Cullin-associated NEDD8-dissociated protein 1 (Fragment) OS=Homo sapiens GN=CAND1 PE=1 SV=1 | 47,67  | 37,62  |
| Q9C0C2     | 182 kDa tankyrase-1-binding protein OS=Homo sapiens GN=TNKS1BP1 PE=1 SV=4                   | 10     | 0      |
| E9PRE7     | Pyruvate carboxylase, mitochondrial OS=Homo sapiens GN=PC PE=1 SV=1                         | 122,86 | 113,09 |
| B5BUE6     | ATP-dependent RNA helicase DDX5 (Fragment) OS=Homo sapiens GN=DDX5 PE=2 SV=1                | 49,49  | 41,39  |
| Q05BV1     | SMC2 protein (Fragment) OS=Homo sapiens GN=SMC2 PE=2 SV=1                                   | 7      | 0      |
| Q8IWZ3     | Ankyrin repeat and KH domain-containing protein 1 OS=Homo sapiens GN=ANKHD1 PE=1 SV=1       | 7      | 0      |
| V9HVX6     | Epididymis luminal protein 9 OS=Homo sapiens GN=HEL-9 PE=2 SV=1                             | 26,83  | 20,06  |
| P56192     | Methionine--tRNA ligase, cytoplasmic OS=Homo sapiens GN=MARS PE=1 SV=2                      | 30,79  | 24,21  |
| Q6A165     | HHa7 protein (Fragment) OS=Homo sapiens GN=KRTHA7 PE=2 SV=1                                 | 38,32  | 32,11  |
| Q7Z3K3     | Pogo transposable element with ZNF domain OS=Homo sapiens GN=POGZ PE=1 SV=2                 | 6      | 0      |
| Q2KQ72     | Chromosome-associated protein E OS=Homo sapiens PE=2 SV=1                                   | 6      | 0      |
| Q6IBN0     | PSMD3 protein OS=Homo sapiens GN=PSMD3 PE=2 SV=1                                            | 33,03  | 27,24  |
| A0A0B4J269 | Tubulin beta-3 chain OS=Homo sapiens GN=TUBB3 PE=1 SV=1                                     | 43,74  | 37,95  |
| P78527     | DNA-dependent protein kinase catalytic subunit OS=Homo sapiens GN=PRKDC PE=1 SV=3           | 5      | 0      |
| A0A024RDG1 | Vesicle docking protein p115, isoform CRA_a OS=Homo sapiens GN=VDP PE=4 SV=1                | 14,03  | 10,31  |
| O95429     | BAG family molecular chaperone regulator 4 OS=Homo sapiens GN=BAG4 PE=1 SV=1                | 26,12  | 23,06  |
| I6TRR8     | SND1-BRAF fusion OS=Homo sapiens PE=2 SV=1                                                  | 27,12  | 24,54  |
| P11216     | Glycogen phosphorylase, brain form OS=Homo sapiens GN=PYGB PE=1 SV=5                        | 36,17  | 33,89  |
| Q13041     | P67 OS=Homo sapiens PE=2 SV=1                                                               | 11,33  | 10,61  |
| Q1KSF8     | XTP3TPA-transactivated protein 1 OS=Homo sapiens GN=XTP3TPATP1 PE=2 SV=1                    | 15,16  | 14,7   |
| Q9Y5X1     | Sorting nexin-9 OS=Homo sapiens GN=SNX9 PE=1 SV=1                                           | 96,88  | 96,88  |
| Q96PK6     | RNA-binding protein 14 OS=Homo sapiens GN=RBM14 PE=1 SV=2                                   | 51,88  | 51,88  |
| K7EQ05     | Granulins OS=Homo sapiens GN=GRN PE=1 SV=1                                                  | 39,26  | 39,26  |
| Q14247     | Src substrate cortactin OS=Homo sapiens GN=CTTN PE=1 SV=2                                   | 37,62  | 37,62  |
| Q7KYM9     | ORF protein OS=Homo sapiens GN=ORF PE=2 SV=1                                                | 25,16  | 25,16  |
| P13667     | Protein disulfide-isomerase A4 OS=Homo sapiens GN=PDIA4 PE=1 SV=2                           | 18,86  | 18,86  |

|            |                                                                                                                  |        |        |
|------------|------------------------------------------------------------------------------------------------------------------|--------|--------|
| Q71E78     | Extraskelatal myxoid chondrosarcoma EWS/TEC/CHN fusion protein (Fragment) OS=Homo sapiens PE=2 SV=1              | 13,44  | 13,44  |
| A9Z0R7     | EWSR1/ZNF384 fusion protein (Fragment) OS=Homo sapiens GN=EWSR1/ZNF384 fusion PE=2 SV=1                          | 13,44  | 13,44  |
| Q14677     | Clathrin interactor 1 OS=Homo sapiens GN=CLINT1 PE=1 SV=1                                                        | 12,61  | 12,61  |
| Q59GL1     | Synaptotagmin binding, cytoplasmic RNA interacting protein variant (Fragment) OS=Homo sapiens PE=2 SV=1          | 10,32  | 10,32  |
| P52948     | Nuclear pore complex protein Nup98-Nup96 OS=Homo sapiens GN=NUP98 PE=1 SV=4                                      | 257,79 | 257,83 |
| Q9Y3I0     | tRNA-splicing ligase RtcB homolog OS=Homo sapiens GN=RTCB PE=1 SV=1                                              | 36,83  | 37,31  |
| P11217     | Glycogen phosphorylase, muscle form OS=Homo sapiens GN=PYGM PE=1 SV=6                                            | 11,68  | 12,59  |
| P26599     | Polypyrimidine tract-binding protein 1 OS=Homo sapiens GN=PTBP1 PE=1 SV=1                                        | 54,79  | 57,27  |
| Q96BA7     | HNRPU protein OS=Homo sapiens PE=2 SV=1                                                                          | 12,65  | 15,95  |
| Q07666     | KH domain-containing, RNA-binding, signal transduction-associated protein 1 OS=Homo sapiens GN=KHDRBS1 PE=1 SV=1 | 29,26  | 32,94  |
| Q00341     | Vigilin OS=Homo sapiens GN=HDLBP PE=1 SV=2                                                                       | 40     | 43,98  |
| Q86VP1     | Tax1-binding protein 1 OS=Homo sapiens GN=TAX1BP1 PE=1 SV=2                                                      | 21,06  | 25,04  |
| P04350     | Tubulin beta-4A chain OS=Homo sapiens GN=TUBB4A PE=1 SV=2                                                        | 10,44  | 14,75  |
| Q5SZU1     | D-3-phosphoglycerate dehydrogenase OS=Homo sapiens GN=PHGDH PE=1 SV=1                                            | 38,44  | 44,73  |
| Q9Y520     | Protein PRRC2C OS=Homo sapiens GN=PRRC2C PE=1 SV=4                                                               | 587,94 | 594,38 |
| Q9HCJ0     | Trinucleotide repeat-containing gene 6C protein OS=Homo sapiens GN=TNRC6C PE=1 SV=3                              | 4      | 10,62  |
| B7ZLC8     | JMJD1C protein OS=Homo sapiens GN=JMJD1C PE=2 SV=1                                                               | 9      | 16     |
| P23141     | Liver carboxylesterase 1 OS=Homo sapiens GN=CES1 PE=1 SV=2                                                       | 19,85  | 27,83  |
| B7Z795     | Carboxylic ester hydrolase OS=Homo sapiens PE=2 SV=1                                                             | 19,85  | 27,83  |
| Q5CAQ5     | Tumor rejection antigen (Gp96) 1 OS=Homo sapiens GN=TRA1 PE=2 SV=1                                               | 272,97 | 281,82 |
| B3KRE9     | POU domain protein OS=Homo sapiens PE=2 SV=1                                                                     | 80,77  | 90,3   |
| Q6P452     | Annexin OS=Homo sapiens GN=ANXA4 PE=1 SV=1                                                                       | 0      | 10,05  |
| A0A024RCC4 | Nucleoporin 98kDa, isoform CRA_a OS=Homo sapiens GN=NUP98 PE=4 SV=1                                              | 247,54 | 257,83 |
| P52272     | Heterogeneous nuclear ribonucleoprotein M OS=Homo sapiens GN=HNRNPM PE=1 SV=3                                    | 114,95 | 125,27 |
| P37837     | Transaldolase OS=Homo sapiens GN=TALDO1 PE=1 SV=2                                                                | 0      | 10,62  |
| P49588     | Alanine--tRNA ligase, cytoplasmic OS=Homo sapiens GN=AARS PE=1 SV=2                                              | 17,55  | 28,49  |
| Q6P2D7     | HNRPM protein (Fragment) OS=Homo sapiens GN=HNRPM PE=2 SV=1                                                      | 50,01  | 60,97  |
| H9ZYJ2     | Thioredoxin OS=Homo sapiens GN=TXN PE=2 SV=1                                                                     | 0      | 11,05  |
| Q86UA1     | Pre-mRNA-processing factor 39 OS=Homo sapiens GN=PRPF39 PE=1 SV=3                                                | 0      | 11,07  |
| P0C7T5     | Ataxin-1-like OS=Homo sapiens GN=ATXN1L PE=1 SV=1                                                                | 0      | 11,16  |
| A0A024R0E5 | Capping protein (Actin filament) muscle Z-line, alpha 1, isoform CRA_a OS=Homo sapiens GN=CAPZA1 PE=4 SV=1       | 0      | 11,2   |
| P60842     | Eukaryotic initiation factor 4A-I OS=Homo sapiens GN=EIF4A1 PE=1 SV=1                                            | 0      | 11,33  |
| P13929     | Beta-enolase OS=Homo sapiens GN=ENO3 PE=1 SV=5                                                                   | 0      | 11,43  |
| B2R4R0     | Histone H4 OS=Homo sapiens GN=HIST1H4H PE=2 SV=1                                                                 | 0      | 11,55  |
| F8W6N3     | Ubiquitin carboxyl-terminal hydrolase OS=Homo sapiens GN=BAP1 PE=1 SV=1                                          | 64,93  | 76,58  |

|            |                                                                                                                                             |        |        |
|------------|---------------------------------------------------------------------------------------------------------------------------------------------|--------|--------|
| P81605     | Dermcidin OS=Homo sapiens GN=DCD PE=1 SV=2                                                                                                  | 10,68  | 22,48  |
| P40925     | Malate dehydrogenase, cytoplasmic OS=Homo sapiens GN=MDH1 PE=1 SV=4                                                                         | 0      | 11,92  |
| M1VPF4     | Tyrosine-protein kinase receptor OS=Homo sapiens GN=TPM3-ROS1 PE=2 SV=1                                                                     | 0      | 12,17  |
| A8MX94     | Glutathione S-transferase P OS=Homo sapiens GN=GSTP1 PE=1 SV=1                                                                              | 0      | 12,22  |
| Q96J92     | Serine/threonine-protein kinase WNK4 OS=Homo sapiens GN=WNK4 PE=1 SV=1                                                                      | 0      | 12,24  |
| Q99536     | Synaptic vesicle membrane protein VAT-1 homolog OS=Homo sapiens GN=VAT1 PE=1 SV=2                                                           | 0      | 12,34  |
| Q8TDJ5     | Tyrosine-protein kinase receptor OS=Homo sapiens GN=TFG/ALK fusion PE=2 SV=1                                                                | 66,52  | 78,94  |
| L0R5C4     | Alternative protein POTEM OS=Homo sapiens GN=POTEM PE=3 SV=1                                                                                | 0      | 12,55  |
| Q5K684     | SCCA1/SCCA2 fusion protein OS=Homo sapiens GN=SERPIN3 PE=1 SV=1                                                                             | 0      | 12,71  |
| A0A0A0MRN4 | DBIRD complex subunit ZNF326 OS=Homo sapiens GN=ZNF326 PE=1 SV=1                                                                            | 55,01  | 67,91  |
| V9HW69     | Epididymis secretory protein Li 66 OS=Homo sapiens GN=HEL-S-66 PE=2 SV=1                                                                    | 0      | 12,98  |
| P41252     | Isoleucine--tRNA ligase, cytoplasmic OS=Homo sapiens GN=IARS PE=1 SV=2                                                                      | 52     | 65,14  |
| A0A024RCN6 | Valyl-tRNA synthetase, isoform CRA_a OS=Homo sapiens GN=VARS PE=3 SV=1                                                                      | 16     | 29,18  |
| F1JVV5     | EWSR1/ATF1 fusion protein type 1 OS=Homo sapiens GN=EWSR1/ATF1 fusion PE=2 SV=1                                                             | 51,85  | 65,31  |
| Q13885     | Tubulin beta-2A chain OS=Homo sapiens GN=TUBB2A PE=1 SV=1                                                                                   | 0      | 13,62  |
| Q8N6B4     | Myeloid/lymphoid or mixed-lineage leukemia/clathrin assembly protein fusion protein (Fragment) OS=Homo sapiens GN=MLL/CALM fusion PE=2 SV=1 | 0      | 13,84  |
| O75342     | Arachidonate 12-lipoxygenase, 12R-type OS=Homo sapiens GN=ALOX12B PE=1 SV=1                                                                 | 0      | 13,84  |
| A6NIW5     | Peroxiredoxin 2, isoform CRA_a OS=Homo sapiens GN=PRDX2 PE=1 SV=2                                                                           | 0      | 13,86  |
| Q58FF2     | Heat shock protein 94c OS=Homo sapiens GN=GRP94c PE=2 SV=1                                                                                  | 0      | 13,94  |
| Q00839     | Heterogeneous nuclear ribonucleoprotein U OS=Homo sapiens GN=HNRNPU PE=1 SV=6                                                               | 12,65  | 26,6   |
| A0A024RAD8 | Aldehyde dehydrogenase 4 family, member A1, isoform CRA_a OS=Homo sapiens GN=ALDH4A1 PE=3 SV=1                                              | 0      | 14,09  |
| O75083     | WD repeat-containing protein 1 OS=Homo sapiens GN=WDR1 PE=1 SV=4                                                                            | 210,76 | 224,97 |
| Q7Z589     | Protein EMSY OS=Homo sapiens GN=EMSY PE=1 SV=2                                                                                              | 216,13 | 230,41 |
| P57740     | Nuclear pore complex protein Nup107 OS=Homo sapiens GN=NUP107 PE=1 SV=1                                                                     | 0      | 14,97  |
| A0A024R2A7 | Lectin, mannose-binding, 1, isoform CRA_b OS=Homo sapiens GN=LMAN1 PE=4 SV=1                                                                | 30,55  | 45,58  |
| P13010     | X-ray repair cross-complementing protein 5 OS=Homo sapiens GN=XRCC5 PE=1 SV=3                                                               | 0      | 15,31  |
| V9HWE9     | Epididymis secretory protein Li 22 OS=Homo sapiens GN=HEL-S-22 PE=2 SV=1                                                                    | 0      | 16,01  |
| P61981     | 14-3-3 protein gamma OS=Homo sapiens GN=YWHAG PE=1 SV=2                                                                                     | 0      | 16,33  |
| P09874     | Poly [ADP-ribose] polymerase 1 OS=Homo sapiens GN=PARP1 PE=1 SV=4                                                                           | 0      | 16,37  |
| Q6LC01     | MRNA encoding beta-tubulin. (from clone D-beta-1) (Fragment) OS=Homo sapiens PE=2 SV=1                                                      | 43,51  | 59,9   |
| Q6GMX6     | IGH@ protein OS=Homo sapiens GN=IGH@ PE=1 SV=1                                                                                              | 0      | 17,29  |
| V9HW68     | Epididymis luminal protein 214 OS=Homo sapiens GN=HEL-214 PE=2 SV=1                                                                         | 0      | 17,29  |
| Q9NZI8     | Insulin-like growth factor 2 mRNA-binding protein 1 OS=Homo sapiens GN=IGF2BP1 PE=1 SV=2                                                    | 110,05 | 127,7  |
| Q14568     | Heat shock protein HSP 90-alpha A2 OS=Homo sapiens GN=HSP90AA2P PE=1 SV=2                                                                   | 0      | 17,89  |
| Q6PEY2     | Tubulin alpha-3E chain OS=Homo sapiens GN=TUBA3E PE=1 SV=2                                                                                  | 12,82  | 30,8   |
| A5A3E0     | POTE ankyrin domain family member F OS=Homo sapiens GN=POTEF PE=1 SV=2                                                                      | 20,82  | 38,98  |



|        |                                                                                                            |        |        |
|--------|------------------------------------------------------------------------------------------------------------|--------|--------|
| V9HWG3 | Epididymis secretory protein Li 45 OS=Homo sapiens GN=HEL-S-45 PE=2 SV=1                                   | 0      | 18,52  |
| Q8IW75 | Serpin A12 OS=Homo sapiens GN=SERPINA12 PE=1 SV=1                                                          | 0      | 18,74  |
| F8WE04 | Heat shock protein beta-1 OS=Homo sapiens GN=HSPB1 PE=1 SV=1                                               | 0      | 18,92  |
| P53396 | ATP-citrate synthase OS=Homo sapiens GN=ACLY PE=1 SV=3                                                     | 146,56 | 165,5  |
| O43143 | Pre-mRNA-splicing factor ATP-dependent RNA helicase DHX15 OS=Homo sapiens GN=DHX15 PE=1 SV=2               | 0      | 19,18  |
| E9KL35 | Epididymis tissue sperm binding protein Li 3a OS=Homo sapiens PE=1 SV=1                                    | 0      | 19,36  |
| Q9UQM3 | Alpha-tubulin (Fragment) OS=Homo sapiens PE=2 SV=1                                                         | 11,01  | 31,05  |
| B0QZ18 | Copine-1 OS=Homo sapiens GN=CPNE1 PE=1 SV=1                                                                | 33,57  | 53,76  |
| B7Z4L4 | Dolichyl-diphosphooligosaccharide--protein glycosyltransferase subunit 1 OS=Homo sapiens GN=RPN1 PE=1 SV=1 | 201,67 | 222,99 |
| P05141 | ADP/ATP translocase 2 OS=Homo sapiens GN=SLC25A5 PE=1 SV=7                                                 | 0      | 21,62  |
| Q96QA5 | Gasdermin-A OS=Homo sapiens GN=GSDMA PE=1 SV=4                                                             | 0      | 21,62  |
| Q8N3Y7 | Epidermal retinol dehydrogenase 2 OS=Homo sapiens GN=SDR16C5 PE=2 SV=2                                     | 0      | 22     |
| H0Y4R1 | Inosine-5'-monophosphate dehydrogenase 2 (Fragment) OS=Homo sapiens GN=IMPDH2 PE=1 SV=1                    | 0      | 22,1   |
| Q06210 | Glutamine--fructose-6-phosphate aminotransferase [isomerizing] 1 OS=Homo sapiens GN=GFPT1 PE=1 SV=3        | 10,8   | 33     |
| A8MXP9 | Matrin-3 OS=Homo sapiens GN=MATR3 PE=1 SV=1                                                                | 0      | 22,22  |
| P26641 | Elongation factor 1-gamma OS=Homo sapiens GN=EEF1G PE=1 SV=3                                               | 0      | 22,25  |
| V9HWK4 | Epididymis luminal protein 162 OS=Homo sapiens GN=HEL162 PE=2 SV=1                                         | 42,4   | 64,71  |
| P51812 | Ribosomal protein S6 kinase alpha-3 OS=Homo sapiens GN=RPS6KA3 PE=1 SV=1                                   | 0      | 22,5   |
| Q6S8J3 | POTE ankyrin domain family member E OS=Homo sapiens GN=POTEE PE=1 SV=3                                     | 20,82  | 43,88  |
| P00338 | L-lactate dehydrogenase A chain OS=Homo sapiens GN=LDHA PE=1 SV=2                                          | 0      | 23,4   |
| P08047 | Transcription factor Sp1 OS=Homo sapiens GN=SP1 PE=1 SV=3                                                  | 83,31  | 106,9  |
| B2R5H0 | Protein S100 OS=Homo sapiens PE=2 SV=1                                                                     | 0      | 24,2   |
| P21796 | Voltage-dependent anion-selective channel protein 1 OS=Homo sapiens GN=VDAC1 PE=1 SV=2                     | 0      | 24,57  |
| B4DT28 | Heterogeneous nuclear ribonucleoprotein R OS=Homo sapiens GN=HNRNPR PE=1 SV=1                              | 48,6   | 73,96  |
| O14841 | 5-oxoprolinase OS=Homo sapiens GN=OPLAH PE=1 SV=3                                                          | 0      | 25,74  |
| Q00610 | Clathrin heavy chain 1 OS=Homo sapiens GN=CLTC PE=1 SV=5                                                   | 93,34  | 119,2  |
| Q59F66 | DEAD box polypeptide 17 isoform p82 variant (Fragment) OS=Homo sapiens PE=2 SV=1                           | 61,12  | 87,23  |
| Q96QK1 | Vacuolar protein sorting-associated protein 35 OS=Homo sapiens GN=VPS35 PE=1 SV=2                          | 0      | 26,59  |
| A4FVC0 | Protein argonaute (Fragment) OS=Homo sapiens GN=EIF2C2 PE=2 SV=1                                           | 0      | 26,7   |
| Q9HCY8 | Protein S100-A14 OS=Homo sapiens GN=S100A14 PE=1 SV=1                                                      | 0      | 27,72  |
| P36952 | Serpin B5 OS=Homo sapiens GN=SERPINB5 PE=1 SV=2                                                            | 0      | 28,03  |
| Q6ZVX7 | F-box only protein 50 OS=Homo sapiens GN=NCCRP1 PE=1 SV=1                                                  | 0      | 28,5   |
| Q08188 | Protein-glutamine gamma-glutamyltransferase E OS=Homo sapiens GN=TGM3 PE=1 SV=4                            | 24,62  | 53,76  |
| V9HW12 | Epididymis secretory sperm binding protein Li 2a OS=Homo sapiens GN=HEL-S-2a PE=2 SV=1                     | 0      | 29,22  |
| Q53H37 | Calmodulin-like skin protein variant (Fragment) OS=Homo sapiens PE=2 SV=1                                  | 0      | 29,51  |
| D3DQF6 | POU domain, class 4, transcription factor 3, isoform CRA_a OS=Homo sapiens GN=POU4F3 PE=4                  | 96,64  | 128,04 |

|            |                                                                                                   |        |        |
|------------|---------------------------------------------------------------------------------------------------|--------|--------|
|            | SV=1                                                                                              |        |        |
| O75400     | Pre-mRNA-processing factor 40 homolog A OS=Homo sapiens GN=PRPF40A PE=1 SV=2                      | 51,75  | 83,21  |
| Q9Y337     | Kallikrein-5 OS=Homo sapiens GN=KLK5 PE=1 SV=2                                                    | 0      | 32,01  |
| Q13748     | Tubulin alpha-3C/D chain OS=Homo sapiens GN=TUBA3C PE=1 SV=3                                      | 16,25  | 48,28  |
| P12036     | Neurofilament heavy polypeptide OS=Homo sapiens GN=NEFH PE=1 SV=4                                 | 0      | 32,12  |
| P49862     | Kallikrein-7 OS=Homo sapiens GN=KLK7 PE=1 SV=1                                                    | 0      | 32,26  |
| P68366     | Tubulin alpha-4A chain OS=Homo sapiens GN=TUBA4A PE=1 SV=1                                        | 14,54  | 47,07  |
| B9EKV4     | Aldehyde dehydrogenase 9 family, member A1 OS=Homo sapiens GN=ALDH9A1 PE=2 SV=1                   | 0      | 32,58  |
| P04040     | Catalase OS=Homo sapiens GN=CAT PE=1 SV=3                                                         | 11,23  | 43,91  |
| P42357     | Histidine ammonia-lyase OS=Homo sapiens GN=HAL PE=1 SV=1                                          | 0      | 32,82  |
| Q5T8P6     | RNA-binding protein 26 OS=Homo sapiens GN=RBM26 PE=1 SV=3                                         | 11     | 44,32  |
| P20073     | Annexin A7 OS=Homo sapiens GN=ANXA7 PE=1 SV=3                                                     | 0      | 33,37  |
| V9HW80     | Epididymis luminal protein 220 OS=Homo sapiens GN=HEL-S-70 PE=1 SV=1                              | 41,46  | 75,34  |
| J3KPD9     | Nucleoside diphosphate kinase B OS=Homo sapiens GN=NME2 PE=1 SV=1                                 | 0      | 33,97  |
| C9J4V0     | Ras-related protein Rab-7a OS=Homo sapiens GN=RAB7A PE=1 SV=1                                     | 0      | 34,73  |
| Q6UWP8     | Suprabasin OS=Homo sapiens GN=SBSN PE=1 SV=2                                                      | 13,84  | 48,7   |
| P23526     | Adenosylhomocysteinase OS=Homo sapiens GN=AHCY PE=1 SV=4                                          | 0      | 36,74  |
| O14980     | Exportin-1 OS=Homo sapiens GN=XPO1 PE=1 SV=1                                                      | 13,39  | 50,44  |
| P31939     | Bifunctional purine biosynthesis protein PURH OS=Homo sapiens GN=ATIC PE=1 SV=3                   | 16,8   | 54,81  |
| P0CG38     | POTE ankyrin domain family member I OS=Homo sapiens GN=POTEI PE=3 SV=1                            | 0      | 38,09  |
| V9HW84     | Epididymis secretory sperm binding protein Li 124m OS=Homo sapiens GN=HEL-S-124m PE=2 SV=1        | 135,51 | 174,64 |
| V9HW26     | ATP synthase subunit alpha OS=Homo sapiens GN=HEL-S-123m PE=1 SV=1                                | 22,19  | 61,5   |
| P06753     | Tropomyosin alpha-3 chain OS=Homo sapiens GN=TPM3 PE=1 SV=2                                       | 0      | 39,33  |
| A0A0A0MR02 | Voltage-dependent anion-selective channel protein 2 (Fragment) OS=Homo sapiens GN=VDAC2 PE=1 SV=1 | 0      | 39,66  |
| Q9H9G7     | Protein argonaute-3 OS=Homo sapiens GN=AGO3 PE=1 SV=2                                             | 0      | 39,97  |
| Q09666     | Neuroblast differentiation-associated protein AHNAK OS=Homo sapiens GN=AHNAK PE=1 SV=2            | 0      | 40,65  |
| Q96P63     | Serpin B12 OS=Homo sapiens GN=SERPINB12 PE=1 SV=1                                                 | 16,05  | 56,71  |
| Q9BVA1     | Tubulin beta-2B chain OS=Homo sapiens GN=TUBB2B PE=1 SV=1                                         | 0      | 40,86  |
| V9HW31     | ATP synthase subunit beta OS=Homo sapiens GN=HEL-S-271 PE=1 SV=1                                  | 0      | 40,92  |
| P21333     | Filamin-A OS=Homo sapiens GN=FLNA PE=1 SV=4                                                       | 0      | 41,56  |
| P05089     | Arginase-1 OS=Homo sapiens GN=ARG1 PE=1 SV=2                                                      | 10,85  | 53,05  |
| Q12906     | Interleukin enhancer-binding factor 3 OS=Homo sapiens GN=ILF3 PE=1 SV=3                           | 424,87 | 467,49 |
| P31947     | 14-3-3 protein sigma OS=Homo sapiens GN=SFN PE=1 SV=1                                             | 0      | 43,48  |
| O75322     | Hsp89-alpha-delta-N OS=Homo sapiens PE=2 SV=1                                                     | 32,6   | 77,81  |
| P01023     | Alpha-2-macroglobulin OS=Homo sapiens GN=A2M PE=1 SV=3                                            | 18,75  | 66,12  |
| B3KSI4     | Transketolase OS=Homo sapiens PE=2 SV=1                                                           | 89,08  | 136,91 |
| V9HVZ7     | Epididymis luminal protein 176 OS=Homo sapiens GN=HEL-176 PE=2 SV=1                               | 12,3   | 61,05  |



|            |                                                                                                        |        |        |
|------------|--------------------------------------------------------------------------------------------------------|--------|--------|
| Q9Y446     | Plakophilin-3 OS=Homo sapiens GN=PKP3 PE=1 SV=1                                                        | 0      | 48,76  |
| P62979     | Ubiquitin-40S ribosomal protein S27a OS=Homo sapiens GN=RPS27A PE=1 SV=2                               | 0      | 49,38  |
| B4DV12     | Polyubiquitin-B OS=Homo sapiens GN=UBB PE=1 SV=1                                                       | 0      | 49,38  |
| P14735     | Insulin-degrading enzyme OS=Homo sapiens GN=IDE PE=1 SV=4                                              | 0      | 50,11  |
| Q32Q12     | Nucleoside diphosphate kinase OS=Homo sapiens GN=NME1-NME2 PE=1 SV=1                                   | 0      | 50,64  |
| P27482     | Calmodulin-like protein 3 OS=Homo sapiens GN=CALML3 PE=1 SV=2                                          | 0      | 50,68  |
| B8ZZK2     | Gamma-glutamylcyclotransferase OS=Homo sapiens GN=GGCT PE=1 SV=1                                       | 0      | 51,05  |
| P47929     | Galectin-7 OS=Homo sapiens GN=LGALS7 PE=1 SV=2                                                         | 0      | 51,33  |
| V9HW43     | Epididymis secretory protein Li 102 OS=Homo sapiens GN=HEL-S-102 PE=2 SV=1                             | 0      | 51,74  |
| P14625     | Endoplasmic reticulum protein OS=Homo sapiens GN=HSP90B1 PE=1 SV=1                                     | 162,47 | 215,19 |
| E5KNY5     | Leucine-rich PPR-motif containing OS=Homo sapiens GN=LRPPRC PE=4 SV=1                                  | 24,19  | 76,94  |
| Q7Z406     | Myosin-14 OS=Homo sapiens GN=MYH14 PE=1 SV=2                                                           | 0      | 52,84  |
| P23246     | Splicing factor, proline- and glutamine-rich OS=Homo sapiens GN=SFPQ PE=1 SV=2                         | 0      | 53,13  |
| P63104     | 14-3-3 protein zeta/delta OS=Homo sapiens GN=YWHAZ PE=1 SV=1                                           | 0      | 54,02  |
| Q9NY65     | Tubulin alpha-8 chain OS=Homo sapiens GN=TUBA8 PE=1 SV=1                                               | 0      | 57,48  |
| Q8TA90     | Similar to Elongation factor 2b (Fragment) OS=Homo sapiens PE=2 SV=1                                   | 133,3  | 191,38 |
| Q5JQ13     | Vinculin (Fragment) OS=Homo sapiens GN=VCL PE=1 SV=1                                                   | 0      | 58,45  |
| O95486     | Protein transport protein Sec24A OS=Homo sapiens GN=SEC24A PE=1 SV=2                                   | 0      | 60,63  |
| A0A087WWI4 | Hypoxia up-regulated protein 1 OS=Homo sapiens GN=HYOU1 PE=1 SV=1                                      | 88     | 149,88 |
| H0YMQ8     | Protein-glutamine gamma-glutamyltransferase K (Fragment) OS=Homo sapiens GN=TGM1 PE=1 SV=1             | 0      | 62,09  |
| P49327     | Fatty acid synthase OS=Homo sapiens GN=FASN PE=1 SV=3                                                  | 253,54 | 317,53 |
| B4DGU4     | Catenin beta-1 OS=Homo sapiens GN=CTNNB1 PE=1 SV=1                                                     | 41,58  | 105,81 |
| Q92945     | Far upstream element-binding protein 2 OS=Homo sapiens GN=KHSRP PE=1 SV=4                              | 0      | 64,58  |
| F8VVB9     | Tubulin alpha-1B chain (Fragment) OS=Homo sapiens GN=TUBA1B PE=1 SV=5                                  | 64,62  | 129,75 |
| A0A024R8Y2 | POU domain protein OS=Homo sapiens GN=POU2F1 PE=3 SV=1                                                 | 202,16 | 270,2  |
| P54886     | Delta-1-pyrroline-5-carboxylate synthase OS=Homo sapiens GN=ALDH18A1 PE=1 SV=2                         | 0      | 68,14  |
| F4ZW65     | NF90b OS=Homo sapiens PE=2 SV=1                                                                        | 314,88 | 383,9  |
| Q9P2N5     | RNA-binding protein 27 OS=Homo sapiens GN=RBM27 PE=1 SV=2                                              | 200,04 | 269,46 |
| A8MT40     | Pyruvate dehydrogenase phosphatase regulatory subunit, mitochondrial OS=Homo sapiens GN=PDPR PE=1 SV=2 | 0      | 69,91  |
| F4ZW66     | NF110b OS=Homo sapiens PE=2 SV=1                                                                       | 340,59 | 411,42 |
| Q0P6H7     | TRIM29 protein OS=Homo sapiens GN=TRIM29 PE=1 SV=2                                                     | 0      | 72,97  |
| Q15149     | Plectin OS=Homo sapiens GN=PLEC PE=1 SV=3                                                              | 0      | 73,5   |
| Q05639     | Elongation factor 1-alpha 2 OS=Homo sapiens GN=EEF1A2 PE=1 SV=1                                        | 30,9   | 105,25 |
| Q9Y3S1     | Serine/threonine-protein kinase WNK2 OS=Homo sapiens GN=WNK2 PE=1 SV=4                                 | 48,27  | 122,89 |
| Q8WVV4     | Protein POF1B OS=Homo sapiens GN=POF1B PE=1 SV=3                                                       | 10,05  | 84,8   |
| F8WD96     | Cathepsin D OS=Homo sapiens GN=CTSD PE=1 SV=1                                                          | 0      | 75,43  |
| E9PLK3     | Puromycin-sensitive aminopeptidase OS=Homo sapiens GN=NPEPPS PE=1 SV=1                                 | 53,82  | 129,41 |

|            |                                                                                                        |        |        |
|------------|--------------------------------------------------------------------------------------------------------|--------|--------|
| C3UMV2     | EWSR1/NFATC2 fusion protein OS=Homo sapiens PE=2 SV=1                                                  | 119,14 | 195,93 |
| Q06830     | Peroxiredoxin-1 OS=Homo sapiens GN=PRDX1 PE=1 SV=1                                                     | 0      | 77,5   |
| P09086     | POU domain, class 2, transcription factor 2 OS=Homo sapiens GN=POU2F2 PE=1 SV=3                        | 0      | 78,41  |
| A0A087X2G1 | ATP-dependent RNA helicase DDX1 OS=Homo sapiens GN=DDX1 PE=1 SV=1                                      | 0      | 78,79  |
| Q93009     | Ubiquitin carboxyl-terminal hydrolase 7 OS=Homo sapiens GN=USP7 PE=1 SV=2                              | 44,4   | 123,3  |
| Q71U36     | Tubulin alpha-1A chain OS=Homo sapiens GN=TUBA1A PE=1 SV=1                                             | 31,42  | 110,37 |
| B2CIS9     | Caspase 14, apoptosis-related cysteine peptidase OS=Homo sapiens GN=CASP14 PE=2 SV=1                   | 0      | 79,48  |
| P33993     | DNA replication licensing factor MCM7 OS=Homo sapiens GN=MCM7 PE=1 SV=4                                | 0      | 80,48  |
| A7BI36     | p180/ribosome receptor OS=Homo sapiens GN=RRBP1 PE=2 SV=2                                              | 0      | 80,94  |
| F4ZW64     | NF90a OS=Homo sapiens PE=2 SV=1                                                                        | 311,63 | 393,38 |
| C9JGE3     | EWS RNA-binding protein variant 6 OS=Homo sapiens GN=EWSR1 PE=1 SV=2                                   | 143,45 | 226,21 |
| A0A024R1N1 | Myosin, heavy polypeptide 9, non-muscle, isoform CRA_a OS=Homo sapiens GN=MYH9 PE=4 SV=1               | 0      | 84,56  |
| A0A024R4H0 | Procollagen-lysine 1, 2-oxoglutarate 5-dioxygenase 1, isoform CRA_a OS=Homo sapiens GN=PLOD1 PE=4 SV=1 | 0      | 84,78  |
| B4DHB3     | Phosphoglycerate kinase OS=Homo sapiens PE=2 SV=1                                                      | 0      | 87,33  |
| Q8IZ29     | Tubulin, beta 2C OS=Homo sapiens GN=TUBB2C PE=2 SV=1                                                   | 63,12  | 150,58 |
| O43823     | A-kinase anchor protein 8 OS=Homo sapiens GN=AKAP8 PE=1 SV=1                                           | 11,76  | 100,79 |
| P07384     | Calpain-1 catalytic subunit OS=Homo sapiens GN=CAPN1 PE=1 SV=1                                         | 0      | 90,03  |
| P52789     | Hexokinase-2 OS=Homo sapiens GN=HK2 PE=1 SV=2                                                          | 0      | 92,41  |
| P05091     | Aldehyde dehydrogenase, mitochondrial OS=Homo sapiens GN=ALDH2 PE=1 SV=2                               | 0      | 93,96  |
| B2R7L2     | Annexin OS=Homo sapiens PE=2 SV=1                                                                      | 0      | 94,88  |
| H0Y339     | E3 ubiquitin-protein ligase RFWD2 (Fragment) OS=Homo sapiens GN=RFWD2 PE=1 SV=1                        | 0      | 98,81  |
| Q5JP53     | Tubulin beta chain OS=Homo sapiens GN=TUBB PE=1 SV=1                                                   | 141,84 | 241,58 |
| Q08554     | Desmocollin-1 OS=Homo sapiens GN=DSC1 PE=1 SV=2                                                        | 273,19 | 374,28 |
| E7EVS6     | Actin, cytoplasmic 1 (Fragment) OS=Homo sapiens GN=ACTB PE=1 SV=5                                      | 10,25  | 111,61 |
| B5BTZ6     | Signal transducer and activator of transcription OS=Homo sapiens GN=STAT3 PE=2 SV=1                    | 0      | 102,56 |
| H3BVG0     | Nuclear pore complex protein Nup93 OS=Homo sapiens GN=NUP93 PE=1 SV=1                                  | 0      | 102,81 |
| O75369     | Filamin-B OS=Homo sapiens GN=FLNB PE=1 SV=2                                                            | 0      | 107,28 |
| Q01212     | Profilaggrin (Fragment) OS=Homo sapiens PE=4 SV=1                                                      | 0      | 107,91 |
| Q96IF9     | VCP protein (Fragment) OS=Homo sapiens GN=VCP PE=2 SV=2                                                | 27,87  | 140,36 |
| Q8NDV7     | Trinucleotide repeat-containing gene 6A protein OS=Homo sapiens GN=TNRC6A PE=1 SV=2                    | 21,17  | 135,52 |
| E9PKU7     | Neutral alpha-glucosidase AB OS=Homo sapiens GN=GANAB PE=1 SV=1                                        | 262,55 | 380,63 |
| A0A0A0MS51 | Gelsolin OS=Homo sapiens GN=GSN PE=1 SV=1                                                              | 0      | 125,01 |
| P04075     | Fructose-bisphosphate aldolase A OS=Homo sapiens GN=ALDOA PE=1 SV=2                                    | 0      | 128,61 |
| P47897     | Glutamine--tRNA ligase OS=Homo sapiens GN=QARS PE=1 SV=1                                               | 0      | 128,93 |
| Q96HA1     | Nuclear envelope pore membrane protein POM 121 OS=Homo sapiens GN=POM121 PE=1 SV=2                     | 0      | 129,74 |
| D6RHH4     | Guanine nucleotide-binding protein subunit beta-2-like 1 OS=Homo sapiens GN=GNB2L1 PE=1 SV=1           | 0      | 131,3  |
| Q15437     | Protein transport protein Sec23B OS=Homo sapiens GN=SEC23B PE=1 SV=2                                   | 0      | 131,99 |

|            |                                                                                          |        |        |
|------------|------------------------------------------------------------------------------------------|--------|--------|
| P63267     | Actin, gamma-enteric smooth muscle OS=Homo sapiens GN=ACTG2 PE=1 SV=1                    | 42,96  | 176,65 |
| O43707     | Alpha-actinin-4 OS=Homo sapiens GN=ACTN4 PE=1 SV=2                                       | 29,28  | 165,5  |
| P17931     | Galectin-3 OS=Homo sapiens GN=LGALS3 PE=1 SV=5                                           | 0      | 137,45 |
| A0A087WTA8 | Collagen alpha-2(I) chain OS=Homo sapiens GN=COL1A2 PE=1 SV=1                            | 0      | 140,22 |
| P35573     | Glycogen debranching enzyme OS=Homo sapiens GN=AGL PE=1 SV=3                             | 89,11  | 231,21 |
| F8W726     | Ubiquitin-associated protein 2-like OS=Homo sapiens GN=UBAP2L PE=1 SV=2                  | 656,94 | 799,64 |
| O95487     | Protein transport protein Sec24B OS=Homo sapiens GN=SEC24B PE=1 SV=2                     | 0      | 143,39 |
| Q15436     | Protein transport protein Sec23A OS=Homo sapiens GN=SEC23A PE=1 SV=2                     | 372,51 | 517,18 |
| M0R1M6     | Ubiquitin-60S ribosomal protein L40 (Fragment) OS=Homo sapiens GN=UBA52 PE=1 SV=1        | 0      | 155,26 |
| V9GZ37     | Heat shock 70 kDa protein 1A OS=Homo sapiens GN=HSPA1A PE=1 SV=1                         | 141,17 | 298,27 |
| P62736     | Actin, aortic smooth muscle OS=Homo sapiens GN=ACTA2 PE=1 SV=1                           | 57,83  | 216,15 |
| A5GZ75     | Beta-actin (Fragment) OS=Homo sapiens PE=2 SV=1                                          | 10,37  | 169,1  |
| Q5D862     | Filaggrin-2 OS=Homo sapiens GN=FLG2 PE=1 SV=1                                            | 10,59  | 177,19 |
| P30876     | DNA-directed RNA polymerase II subunit RPB2 OS=Homo sapiens GN=POLR2B PE=1 SV=1          | 0      | 167,1  |
| P40926     | Malate dehydrogenase, mitochondrial OS=Homo sapiens GN=MDH2 PE=1 SV=3                    | 0      | 167,44 |
| Q92817     | Envoplakin OS=Homo sapiens GN=EVPL PE=1 SV=3                                             | 0      | 182,38 |
| Q9UL18     | Protein argonaute-1 OS=Homo sapiens GN=AGO1 PE=1 SV=3                                    | 0      | 183,88 |
| Q13867     | Bleomycin hydrolase OS=Homo sapiens GN=BLMH PE=1 SV=1                                    | 0      | 185,65 |
| F5H5D3     | Tubulin alpha-1C chain OS=Homo sapiens GN=TUBA1C PE=1 SV=1                               | 142,52 | 330,32 |
| Q59GA5     | Insulysin variant (Fragment) OS=Homo sapiens PE=2 SV=1                                   | 0      | 187,95 |
| Q99567     | Nuclear pore complex protein Nup88 OS=Homo sapiens GN=NUP88 PE=1 SV=2                    | 21,92  | 215,24 |
| X5D7K9     | Major vault protein isoform C (Fragment) OS=Homo sapiens GN=MVP PE=2 SV=1                | 251,09 | 449,41 |
| Q9NYU2     | UDP-glucose:glycoprotein glucosyltransferase 1 OS=Homo sapiens GN=UGGT1 PE=1 SV=3        | 0      | 204,49 |
| B4DUI5     | Triosephosphate isomerase OS=Homo sapiens PE=2 SV=1                                      | 0      | 213,36 |
| I6L8B7     | Fatty acid-binding protein, epidermal OS=Homo sapiens GN=FABP5 PE=1 SV=1                 | 0      | 217,46 |
| P68133     | Actin, alpha skeletal muscle OS=Homo sapiens GN=ACTA1 PE=1 SV=1                          | 94,68  | 318,32 |
| P06733     | Alpha-enolase OS=Homo sapiens GN=ENO1 PE=1 SV=2                                          | 35,65  | 261,85 |
| V9HWB4     | Epididymis secretory sperm binding protein Li 89n OS=Homo sapiens GN=HEL-S-89n PE=2 SV=1 | 0      | 237,58 |
| A0A075B730 | Epiplakin OS=Homo sapiens GN=EPPK1 PE=1 SV=2                                             | 0      | 241,26 |
| P08238     | Heat shock protein HSP 90-beta OS=Homo sapiens GN=HSP90AB1 PE=1 SV=4                     | 181,26 | 428,74 |
| Q0EFA5     | S protein OS=Homo sapiens GN=S PE=4 SV=1                                                 | 0      | 262,14 |
| A1XP52     | Catecholamine-regulated protein 40 OS=Homo sapiens PE=2 SV=1                             | 43,34  | 311,16 |
| L8B196     | Ubiquitin C OS=Homo sapiens GN=UbC PE=4 SV=1                                             | 168,39 | 455,94 |
| P07900     | Heat shock protein HSP 90-alpha OS=Homo sapiens GN=HSP90AA1 PE=1 SV=5                    | 230,76 | 560,94 |
| Q02413     | Desmoglein-1 OS=Homo sapiens GN=DSG1 PE=1 SV=2                                           | 0      | 349,12 |
| Q2TSD0     | Glyceraldehyde-3-phosphate dehydrogenase OS=Homo sapiens PE=2 SV=1                       | 63,22  | 433,06 |
| A0A087WYPO | Hepatocyte nuclear factor 1-alpha OS=Homo sapiens GN=HNF1A PE=1 SV=1                     | 324,92 | 697,05 |

|            |                                                                                                |         |         |
|------------|------------------------------------------------------------------------------------------------|---------|---------|
| P02545     | Prelamin-A/C OS=Homo sapiens GN=LMNA PE=1 SV=1                                                 | 0       | 378,97  |
| A0A0A0MRA5 | Heterogeneous nuclear ribonucleoprotein U-like protein 1 OS=Homo sapiens GN=HNRNPUL1 PE=1 SV=1 | 674,39  | 1083,78 |
| J3KT65     | Actin, cytoplasmic 2 OS=Homo sapiens GN=ACTG1 PE=1 SV=1                                        | 180,96  | 600,45  |
| F5H2U4     | Ubiquitin-associated protein 2 OS=Homo sapiens GN=UBAP2 PE=1 SV=2                              | 742,22  | 1169    |
| A0A0D9SFL3 | RNA-binding protein EWS OS=Homo sapiens GN=EWSR1 PE=1 SV=1                                     | 620,53  | 1050,82 |
| Q53G76     | Beta actin variant (Fragment) OS=Homo sapiens PE=2 SV=1                                        | 195,51  | 661,53  |
| Q562L5     | Actin-like protein (Fragment) OS=Homo sapiens GN=ACT PE=3 SV=1                                 | 0       | 497,85  |
| H0YLV6     | Annexin OS=Homo sapiens GN=ANXA2 PE=1 SV=1                                                     | 0       | 591,3   |
| Q9H4A3     | Serine/threonine-protein kinase WNK1 OS=Homo sapiens GN=WNK1 PE=1 SV=2                         | 911,75  | 1532,16 |
| P20930     | Filaggrin OS=Homo sapiens GN=FLG PE=1 SV=3                                                     | 0       | 660,26  |
| P49790     | Nuclear pore complex protein Nup153 OS=Homo sapiens GN=NUP153 PE=1 SV=2                        | 1951,66 | 2686,26 |
| P14923     | Junction plakoglobin OS=Homo sapiens GN=JUP PE=1 SV=3                                          | 526,78  | 1399,32 |
| P35658     | Nuclear pore complex protein Nup214 OS=Homo sapiens GN=NUP214 PE=1 SV=2                        | 1292,99 | 2505,93 |
| Q53G85     | Elongation factor 1-alpha (Fragment) OS=Homo sapiens PE=2 SV=1                                 | 782,26  | 2309,22 |
